1 **SHIV.CH505-infected infant and adult rhesus macaques exhibit similar HIV Env-**  
2 **specific antibody kinetics, despite distinct T-follicular helper (Tfh) and germinal**  
3 **center B cell landscapes**

4  
5 Ashley N. Nelson<sup>a</sup>, Ria Goswami<sup>a</sup>, Maria Dennis<sup>a</sup>, Joshua Tu<sup>a</sup>, Riley J. Mangan<sup>a</sup>, Pooja  
6 T. Saha<sup>b</sup>, Derek W. Cain<sup>a</sup>, Xiaoying Shen<sup>a</sup>, George M. Shaw<sup>c</sup>, Katharine Bar<sup>c</sup>, Michael  
7 Hudgens<sup>b</sup>, Justin Pollara<sup>a</sup>, Kristina De Paris<sup>d</sup>, Koen K.A. Van Rompay<sup>e</sup> and Sallie R.  
8 Permar<sup>a#</sup>.

9  
10 <sup>a</sup>Human Vaccine Institute, Duke University Medical Center, Durham, NC, USA

11 <sup>b</sup>Gillings School of Public Health and Center for AIDS Research, University of North  
12 Carolina at Chapel Hill, Chapel Hill, North Carolina, USA

13 <sup>c</sup>Department of Medicine, University of Pennsylvania, Philadelphia, PA, USA

14 <sup>d</sup>Department of Microbiology and Immunology and Center for AIDS Research, School of  
15 Medicine, University of North Carolina at Chapel Hill, Chapel Hill, North Carolina, USA

16 <sup>e</sup>California National Primate Research Center, University of California, Davis, CA, USA

17

18 Running Head: Antibody responses in SHIV.CH505-infected macaques

19

20 #Address correspondence to Sallie R. Permar, [sallie.permar@duke.edu](mailto:sallie.permar@duke.edu).

21 A.N.N. and R.G. contributed equally to this work.

22 Abstract Word count: 224

23 Text Word count: 6,229

24 **Abstract**

25           Pediatric HIV infection remains a large global health concern despite the  
26 widespread use of antiretroviral therapy (ART). Thus, global elimination of pediatric HIV  
27 infections will require the development of novel immune-based approaches, and  
28 understanding infant immunity to HIV is critical to guide the rational design of these  
29 intervention strategies. Despite their immunological immaturity, HIV-infected children  
30 develop broadly neutralizing antibodies (bnAbs) more frequently and earlier than adults  
31 do. Furthermore, T-follicular helper (Tfh) cells have been associated with bnAb  
32 development in HIV-infected children and adults. To further our understanding of age-  
33 related differences in the development of HIV-specific immunity, we evaluated the  
34 generation of virus-specific humoral immune responses in infant (n=6) and adult (n=12)  
35 rhesus macaques (RMs) infected with a transmitted/founder (T/F) simian-human  
36 immunodeficiency virus (SHIV.C.CH505). The plasma HIV envelope-specific IgG  
37 antibody kinetics were similar in SHIV-infected infant and adult RMs, with no significant  
38 differences in the magnitude or breadth of these responses. Interestingly, autologous  
39 tier 2 virus neutralization responses also developed with similar frequency and kinetics  
40 in infant and adult RMs, despite infants exhibiting significantly higher Tfh and germinal  
41 center B cell frequencies compared to adults. Our results indicate that the humoral  
42 immune response to SHIV infection develops with similar kinetics among infant and  
43 adult RMs, suggesting that the early life immune system is equipped to respond to HIV-  
44 1 and promote the production of neutralizing HIV antibodies.

45

46

## 47 **Importance**

48 There is a lack of understanding on how the maturation of the infant immune system  
49 influences immunity to HIV infection, or how these responses differ from those of adults.  
50 Improving our knowledge of infant HIV immunity will help guide antiviral intervention  
51 strategies that take advantage of the unique infant immune environment to successfully  
52 elicit protective immune responses. We utilized a rhesus macaque model of SHIV  
53 infection as a tool to distinguish the differences in HIV humoral immunity in infants  
54 versus adults. Here, we demonstrate that the kinetics and quality of the infant humoral  
55 immune response to HIV are highly comparable to that of adults during the early phase  
56 of infection, despite distinct differences in their Tfh responses, indicating that slightly  
57 different mechanisms may drive infant and adult humoral immunity.

58 Word count: 129/150

59

## 60 **Introduction**

61 Despite the widespread availability of anti-retroviral (ARV) therapy for HIV-  
62 infected pregnant women, approximately 180,000 infants were newly infected in 2017  
63 due to issues of treatment access and adherence, and acute maternal HIV infection (1).  
64 While the developing immune system and lack of immunological memory during early  
65 infancy can render neonates more susceptible to infections, it may also provide an  
66 opportunity for unique interventions. Furthermore, HIV immunization in infancy could be  
67 an opportunity to both interrupt postnatal transmission to breastfeeding infants, the  
68 current most common mode of infant HIV infection (2), as well as elicit life-long HIV

69 immunity prior to the renewed HIV acquisition risk upon sexual debut. A better  
70 understanding of how the infant's developing immune system influences disease  
71 outcome and pathogenesis during HIV infection and how it compares to adults is  
72 imperative to inform the design and evaluation of pediatric intervention therapies and  
73 vaccination strategies.

74         The disease course in HIV-infected infants is dramatically different from that of  
75 HIV-infected adults (3). Without treatment, vertically HIV-infected infants tend to have  
76 higher plasma viral RNA loads, experience rapid declines in peripheral CD4+ T cell  
77 counts, and progress to AIDS more rapidly than adults (4, 5). However, transmission  
78 studies have indicated that infants infected during breast-feeding tend to have a better  
79 clinical outcome. Specifically, postnatal HIV-infected infants have a lower risk of  
80 mortality within the first 18 months of infection (6), increased median survival times from  
81 infection (7), and better long-term survival rates (8, 9) than infants who acquire HIV  
82 infection perinatally. The ontogeny of HIV Env-specific antibodies is also quite different  
83 between infants and adults, and understanding these differences could inform infant  
84 HIV Env vaccine development and evaluation. In HIV-infected adults, Env-specific  
85 antibodies are detectable by approximately 14 days after infection (10). Yet the early  
86 kinetics of HIV-exposed, infected infants' natural IgG responses are masked by  
87 placentally-acquired maternal antibody. More importantly, increases in HIV-specific IgG  
88 responses from 6 months through the first year of life have been implicated in a better  
89 clinical outcome (11, 12). Interestingly, recent studies have indicated that HIV-infected  
90 infants frequently develop broadly neutralizing antibodies (bnAbs) during early life  
91 (range: 11.4-28.2 months), and a bnAb isolated from an infected infant exhibited lower

92 levels of somatic hypermutation than adult-isolated bnAbs with similar potency and  
93 breadth (13-15). Despite the early development of bnAbs in infants, the presence of  
94 antibodies capable of mediating antibody-dependent cellular cytotoxicity (ADCC) have  
95 been reported to be delayed in infants infected during the first 6 weeks of life, yet are  
96 associated with a better outcome of disease (16, 17). Thus, it is likely that the immune  
97 mechanisms associated with disease progression in pediatric HIV differ from those of  
98 adults, and further studies in animal models would help determine key features of the  
99 infant immune landscape that have the greatest influence on disease pathogenesis.

100         Experimental infection of non-human primates (NHP) with chimeric simian-  
101 human immunodeficiency virus (SHIV) remains an invaluable model for studying HIV  
102 pathogenesis, and evaluating therapeutic and prevention strategies. In addition, the  
103 rhesus macaque-SHIV model can be used to define differences in the ontogeny of  
104 immune responses directed against HIV between infants and adults. We have utilized  
105 this model to study adult and infant humoral immune responses to acute infection with  
106 SHIV.C.CH505, a next generation SHIV expressing the Env glycoprotein of the HIV-1  
107 transmitted/founder CH505 (subtype C) virus, isolated from a HIV-infected adult that  
108 developed plasma bnAb activity (18-20). A mutation within the CD4 binding site of this  
109 SHIV Env facilitates enhanced interaction with the rhesus CD4 molecule (18). More  
110 importantly, SHIV.C.CH505 can infect and replicate efficiently in rhesus macaques, and  
111 exhibit plasma viral load kinetics in macaques similar to those seen in acute HIV-1  
112 infections in humans (18). Using this highly relevant infection model, we conducted a  
113 longitudinal analysis of the virus-specific humoral immune response in SHIV.C.CH505-  
114 infected infant and adult monkeys, and defined the virologic and immunologic features

115 that are associated with the development of plasma neutralization activity in each age  
116 group. This work will allow us to improve our understanding of age-related differences in  
117 HIV Env-specific B-cell immunity elicited during acute infection, which can guide the  
118 development of infant vaccine strategies that can optimally prime B cells for virus  
119 neutralizing responses.

120

## 121 **Results**

122 **Infant and adult RMs exhibit similar plasma viral load kinetics following**  
123 **SHIV.C.CH505 infection.** Twelve female, adult rhesus macaques (age range: 4-10 y.o;  
124 Table 1) were infected intravenously with SHIV.C.CH505 at a dose of  $3.4 \times 10^5$  TCID<sub>50</sub>.  
125 All twelve adult monkeys became infected after the first inoculation. To mimic breast  
126 milk transmission, six infant rhesus macaques were infected orally starting at 4 weeks of  
127 age (Table 1) with a repeated exposure regimen that has been successfully developed  
128 with SIV<sub>mac251</sub> to simulate exposure to HIV by breastfeeding (21, 22). Once infected,  
129 viremia peaked at 2 weeks in both age groups and the peak viremia was of similar  
130 magnitude between the groups (infant range:  $6.7 \times 10^5$  -  $3.2 \times 10^7$ ; adult range:  $3 \times 10^5$ -  
131  $1.3 \times 10^7$  vRNA copies/mL of plasma ) (Fig. 1A). At 12 wpi, 11 of the 12 adult monkeys,  
132 and 4 of the 6 infant monkeys maintained plasma viral loads above the limit of detection  
133 of the assay (15 vRNA copies/mL of plasma) (Fig. 1A). Both infant and adult monkeys  
134 exhibited decreased frequencies of CD4+ T cells at 3 wpi (Fig. 1B), however these  
135 frequencies were maintained through 12 wpi with no observed changes in CD4+ T cell  
136 counts (Fig. 1C), thus the SHIV.C.CH505 virus exhibited a more attenuated phenotype

137 in infant monkeys in contrast to observations in the SIV<sub>mac251</sub> model (23-25). Since the  
138 same viremic pattern was observed in both age groups independent of the route of  
139 infection, this model provided an opportunity to define differences in the infant and adult  
140 immune response to SHIV infection.

141

142 **The kinetics, magnitude, and specificity of HIV Env-specific plasma IgG**  
143 **responses are similar in infant and adult RMs during acute SHIV.C.CH505**

144 **infection.** We measured HIV Env-specific antibody responses to evaluate whether the  
145 ontogeny of these responses would differ between the infant and adult monkeys. In both  
146 groups, CH505 gp120-specific responses were detectable by 3 wpi with no statistically  
147 significant difference in magnitude (median gp120 IgG in infants and adults, 1,297 ng/ml  
148 and 1785 ng/ml, respectively,  $p=0.301$ ) (Fig. 2A). These responses continued to  
149 increase through 12 wpi with no significant difference in magnitude (median gp120 IgG  
150 in infants and adults,  $1.3 \times 10^5$  ng/ml and  $2.3 \times 10^5$  ng/ml, respectively,  $p=0.494$ ) or  
151 kinetics between infants and adults (Fig. 2A). Overall, the kinetics and magnitude of the  
152 gp41-specific plasma IgG response was also not significantly different between both  
153 age groups (Fig. 2B). However, at 12 wpi the infant monkeys exhibited a trend towards  
154 lower gp41-specific IgG responses compared to that of adults, although this difference  
155 was not significant after correction for multiple comparisons (median gp41 IgG in infants  
156 and adults at 12 wpi, 3,712 ng/ml and 23,305 ng/ml, respectively,  $p=.041$ ; FDR  $p=.458$ )  
157 (Fig. 2B).

158 To determine the specificity of the plasma Env-specific IgG responses between  
159 age groups, we used a binding antibody multiplex assay (BAMA) to assess binding to

160 various HIV Env linear and conformational epitopes at weeks 4 (Fig. 3A) and 12 (Fig.  
161 3B) post-infection. For both groups, anti-V3 and –C5 binding responses were dominant  
162 and increased from week 4 to week 12 (Fig. 3A and B). Although infant monkeys  
163 exhibited a slightly higher antibody specificity for the CD4 binding site at 3 wpi, these  
164 differences were not statistically significant ( $p=0.438$ ; Fig. 3C). While anti-V2 responses  
165 were rarely detected by BAMA (Fig. 3A and B), linear peptide microarray analysis  
166 demonstrated that these responses were primarily CH505-specific (Fig. S1). We also  
167 used BAMA to assess cross-clade gp120 and gp140 breadth at 4 and 12 wpi (Fig. 4A  
168 and B). At 12 wpi, antibodies from infants and adults recognized all nine gp120 and  
169 gp140 antigens tested demonstrating breadth acquisition (Fig 4B). Overall, the median  
170 gp120- and gp140-specific IgG responses across all clades trended higher at week 12  
171 in adult monkeys, consistent with a higher gp41 plasma IgG binding response (Fig. 4B).

172

173 **SHIV.C.CH505-infected infant monkeys have higher proportions of T-follicular**  
174 **helper (Tfh) cells in the lymph node compared to that of adults.** Frequencies of Tfh  
175 cells have been reported to be increased in HIV-infected children compared to adults  
176 (26). In order to investigate Tfh cell responses during the early phase of SHIV infection,  
177 we evaluated the proportions of CH505-specific (Fig. 5A) and total CD4+ CXCR5<sup>hi</sup>  
178 PD1<sup>hi</sup> (Fig. 5B) Tfh cells in the lymph node of infant and adult monkeys at 12 wpi. While  
179 the proportion of CH505-specific Tfh cells was not significantly different between the two  
180 groups ( $p=0.592$ ), the infants had significantly higher proportions of total CD4+ CXCR5<sup>hi</sup>  
181 PD1<sup>hi</sup> Tfh cells ( $p=0.024$ ; FDR  $p=.036$ ) (Fig. 5A and B). Additionally, we compared the  
182 frequencies of the Tfh subsets based on the surface expression of CXCR3 and CCR6



183 as follows: Tfh1 (CXCR3+ CCR6-), Tfh2 (CXCR3- CCR6-), and Tfh17 (CXCR3-  
184 CCR6+) (Fig. 5C-E). In all, adult monkeys exhibited a significantly higher proportion of  
185 Tfh1 cells in the lymph node ( $p= 0.013$ ; FDR  $p=.021$ ) (Fig. 5C), while infants had a  
186 significantly higher proportion of Tfh17 cells ( $p= 0.001$ ; FDR  $p=.003$ ) (Fig. 5E) at 12 wpi.  
187 No significant difference was observed in Tfh2 proportions between the two age groups  
188 ( $p=0.066$ ) (Fig. 5D).

189

190 **Proportions of CH505-specific memory B cells are similar between infant and**  
191 **adult monkeys.** We evaluated systemic memory B cells in infant and adult monkeys at  
192 0, 6, and 12 wpi (Fig. 6A and B). Additionally, we compared the frequency of total B  
193 cells and germinal center (GC) B cells in the lymph node at 12 wpi between both age  
194 groups (Fig. 6C-E). Due to lack of sample availability, memory B cell populations at  
195 week 0 in the systemic compartment were only evaluated in 3 monkeys from each age  
196 group. Changes from baseline in total memory B cells (CD14- CD16- CD20+ IgD-  
197 CD27+) and CH505 gp120-specific memory B cells, were not significantly different  
198 between age groups at 6 and 12 wpi ( $p=1$ ; 6 and 12 wpi for both parameters) (Fig. 6A  
199 and B). Similarly, the frequencies of total B cells (CD3- CD20+) in lymph nodes were  
200 not significantly different ( $p = 0.143$ ) (Fig. 6D) at 12 wpi. However, infants exhibited a  
201 significantly higher frequency of GC B cells (CD20+ Bcl6+ Ki67+) (Fig. 6C) compared to  
202 adults ( $p= 0.03$ ; FDR  $p=0.05$ ) (Fig. 6E), consistent with high proportions of Tfh cells in  
203 the lymph node at 12 wpi (Fig. 5B).

204

205 **SHIV.C.CH505-infected infant and adult monkeys similarly develop virus tier 2**  
206 **autologous plasma neutralization responses.** Since the kinetics, magnitude, and  
207 breadth of plasma HIV Env-specific IgG responses were similar between infant and  
208 adult monkeys, we next evaluated the HIV neutralization activity of these plasma IgG  
209 responses. We found that both age groups developed similar neutralization activity at  
210 12 wpi against the tier 1 clade-matched isolates MW965 (ID<sub>50</sub> range infants: 135-  
211 31,736; adults: 324-4,949,  $p = 0.384$ ) (Fig. 7A) and CH505 w4.3 (ID<sub>50</sub> range infants: 45-  
212 950; adults: 45-750;  $p=0.605$ ) (Fig. 7B). Further, neutralization activity against the  
213 autologous tier 2 neutralization sensitive challenge virus, CH505 T/F, was not observed  
214 in the majority of monkeys from both age groups until 12 wpi (Fig. 7C). Eight out of 12  
215 adults (66.7%) and 3 out of 6 infants (50%) developed autologous virus neutralizing  
216 responses by 12wpi with no significant difference in potency (ID<sub>50</sub> range infants: 45-161;  
217 adults: 45-380;  $p= 0.963$ ) (Fig. 7C).

218

219 **ADCC activity of plasma antibodies develops similarly in adult and infant acutely**  
220 **SHIV-infected monkeys.** ADCC activity was assessed by the NK cell granzyme B  
221 response mediated by plasma from infant and adult RMs at 0, 6, and 10 wpi. ADCC  
222 activity was detectable in both age groups by week 6 of infection, and was maintained  
223 through week 10 with no significant difference in the magnitude or kinetics of the  
224 response between the two groups (6 wpi:  $p= 0.494$  and 10 wpi:  $p= 0.591$ ) (Fig. 8A).  
225 While similar kinetics were observed in CH505-specific ADCC Ab titers in adults and  
226 infants, infants exhibited plasma ADCC titers that were generally lower than adults, yet

227 the differences were not statistically significant (6 wpi:  $p= 0.801$  and 10 wpi:  $p= 0.807$ )  
228 (Fig. 8B).

229

230 **Viral load at 12 wpi is significantly correlated with the development of autologous**  
231 **virus neutralization in infant and adult monkeys.** We calculated spearman  
232 correlation coefficients to determine if a subset of the immunological responses  
233 assessed could predict the development of autologous neutralization in infant and adult  
234 monkeys at 12 wpi. CH505-specific gp120 IgG responses ( $\rho= .69$ ,  $p=.002$ , FDR  $p=$   
235  $.07$ ) (Fig. 9B), ADCC antibody titers at 10 wpi ( $\rho= .63$ ,  $p=.01$ , FDR  $p= .16$ ) (Fig. 9C),  
236 and CH505-specific Tfh cell frequencies at 12 wpi ( $\rho= .49$ ,  $p=.05$ , FDR  $p= .19$ ) (Fig.  
237 9D) were correlated with the development of autologous neutralization. However, these  
238 results were not statistically significant after adjustment for multiple comparisons. Yet,  
239 plasma viral load at 12 wpi was correlated with autologous neutralization after  
240 adjustment for multiple comparisons ( $\rho= .76$ ,  $p < .001$ , FDR  $p= .03$ ) (Fig. 9A). A  
241 summary of all the immune parameters assessed can be found in Figure S3 and Table  
242 S5.

243 ADCC activity has been suggested to be associated with reduced risk of infection  
244 and/or viral control in a number of studies (6,24, 25). We calculated spearman  
245 correlation coefficients to determine if a subset of the immunological parameters  
246 assessed were associated with the development antibodies capable of mediating  
247 ADCC. Overall, none of the immune responses evaluated appeared to predict ADCC  
248 activity. A summary of all the immune parameters assessed can be found in Figure S4  
249 and Table S6.

## 250 **Discussion**

251           The elimination of pediatric HIV infections and achievement of life-long immunity  
252 will likely require the development of successful immunization strategies tailored to the  
253 infant immune landscape. Thus, an understanding of the infant immune response and  
254 pathways for the development of neutralizing antibodies during HIV infection are critical  
255 to inform rational vaccine design. In this work, we utilized a rhesus macaque model of  
256 SHIV infection to better understand the development of HIV-specific immune responses  
257 in infants versus adults. The magnitude, kinetics, and specificity of HIV Env-specific  
258 plasma IgG responses were similar in SHIV.C.CH505 T/F-infected infant and adult  
259 monkeys. Furthermore, CH505 T/F-specific Tfh and memory B cell responses  
260 developed similarly in both age groups, consistent with the observed similarities in HIV  
261 Env-specific plasma IgG response. However, infant monkeys exhibited significantly  
262 higher frequencies of total Tfh and GC B cells in the lymph node during the early phase  
263 of infection. Moreover, acute SHIV.C.CH505 T/F infection elicited tier 2 autologous virus  
264 neutralization and ADCC responses that were similar in frequency and magnitude  
265 between both age groups. Lastly, correlation analysis determined that the magnitude of  
266 the plasma viral load was the strongest predictor of the development of autologous virus  
267 neutralization in both age groups.

268           A number of previous studies have demonstrated that differences exist between  
269 adult and pediatric immunity to HIV. A study of 46 HIV-infected human infants age 0 to  
270 12 months suggests that infants develop antibodies against gp160 first, followed by anti-  
271 gp120 and –gp41 antibodies (11). However, the initial Env-specific antibody response in  
272 HIV-infected adults target gp41, and are non-neutralizing (10). While we observed

273 similar kinetics of anti-gp120 plasma IgG antibodies in SHIV.C.CH505-infected infant  
274 and adult monkeys, gp41-specific responses exhibited a trend towards lower magnitude  
275 in the infant monkeys. Autologous virus neutralization responses also developed  
276 similarly in SHIV.C.CH505-infected adult and infant monkeys, with at least 50% of  
277 animals from both age groups exhibiting this response at 12 wpi (Fig. 7C). In human  
278 adults, autologous virus neutralization develops in approximately 3-6 months of infection  
279 (27-31), while neutralization breadth develops after 2-3 years (19, 20). In infants,  
280 exactly when autologous neutralizing antibodies develop is unknown and such analysis  
281 is difficult due to the presence of maternal antibodies. However, it has recently been  
282 recognized that HIV-infected infants can develop bnAbs as early as 1-2 years post-  
283 infection (13). If our results are reflective of what is happening in humans, it could  
284 suggest that the initial kinetics of neutralizing antibody responses is comparable  
285 between adults and infants, but subsequently infants acquire breadth faster than adults  
286 do. Interestingly, only plasma viral load was identified as a determinant of tier 2  
287 autologous virus neutralization development among SHIV.C.CH505-infected infant and  
288 adult monkeys, suggesting that the development of autologous neutralization may be  
289 dependent upon antigen load. Further studies are needed to fully identify predictors of  
290 autologous neutralization, particularly since this response precedes the development of  
291 bnAbs in some individuals (20, 32, 33).

292 CD4+ T-follicular helper (Tfh) cells are crucial in providing help to B cells in the  
293 germinal center (GC) to support antibody maturation (34). A recent study of HIV-1 clade  
294 C-infected human children and adults demonstrated that frequencies of total Tfh  
295 (CXCR5+ PD1<sup>hi</sup>) and HIV-specific (Gag/Env), IL-21-producing GC-Tfh cells in oral

296 lymphoid tissue were increased in older children receiving ART (age range: 6-10 years),  
297 however it is unknown whether this is true in early life (26). In our monkey model, we  
298 observed higher frequencies of total lymphoid Tfh cells and GC B cells in SHIV-infected  
299 infants compared to adults at 12 wpi (Fig. 5B and 6E). Yet, both age groups exhibited  
300 similar CH505-specific Tfh frequencies at 12 wpi (Fig. 5A) corresponding with a similar  
301 magnitude in CH505 gp120 IgG binding responses (Fig. 2A) and systemic memory B  
302 cell responses (Fig. 6A and B). However, the quality of these Tfh responses may not be  
303 optimal early in infection, as we observed that only about 50% of the monkeys from both  
304 age groups developed autologous virus neutralization responses by 12 wpi. Tfh cells  
305 can further be characterized into distinct functional subsets, namely, Tfh1 (CXCR3+),  
306 Tfh2 (CXCR3- CCR6-), and Tfh17 (CCR6+) (35). Preferential enhancement of Tfh1  
307 cells in the blood and lymph node have been observed in chronic SIV infection (36, 37),  
308 yet a recent study has reported the expansion of Tfh2 subsets during acute HIV  
309 infection in adults (38). We observed that during acute SHIV infection, adult monkeys  
310 exhibited significantly higher frequencies of Tfh1 cells whereas Tfh17 cells were  
311 significantly higher in infants (Fig. 5C and E). Thus, acute SHIV infection induces a  
312 distinct Tfh phenotype in infants and adults. It is possible that distinctions in HIV  
313 immunity within our infant cohort are a result of maturation of the immune response  
314 rather than SHIV infection, thus future studies would need to include an age-matched  
315 infant control group. Nonetheless, imbalances in Tfh polarization may be implicated in  
316 HIV disease pathogenesis and further work in animal models are needed to define the  
317 mechanistic roles of Tfh phenotypes during HIV infection.

318 Our results suggest that the humoral immune response to SHIV infection  
319 develops similarly in adult and infant RMs, and corroborates with findings in human  
320 cohorts demonstrating that infants can develop robust HIV Env binding and neutralizing  
321 antibody responses despite their maturing immune landscape. Additionally, we have  
322 demonstrated that the Tfh landscape during acute infection in infants is distinct from that  
323 of adults, which may offer a potential advantage for infant vaccination, especially since  
324 studies suggest that infants are able to mount robust antibody responses to HIV Env  
325 vaccination, and these responses tend to be comparable or superior to that of adults  
326 (39-42). However, gaps in our knowledge still exists when it comes to understanding the  
327 infant immune response to HIV infection and how it can be harnessed for optimal  
328 vaccine-mediated protection against HIV-1. Thus, further development of infant SHIV  
329 models that depict human HIV-1 immunopathogenesis are imperative to further our  
330 understanding of infant HIV immunity and to inform vaccine elicitation of long-term  
331 protective immunity.

332

## 333 **Materials and Methods**

334 **Animal care and sample collection.** Adult female rhesus macaques ranged from 4 to  
335 10 years of age, and infant rhesus macaques ranged from 6 weeks of age (Table 1). All  
336 macaques were of Indian origin, and from the type D retrovirus-free, SIV-free and  
337 STLV-1 free colony of the California National Primate Research Center (CNPRC; Davis,  
338 CA). Animals were maintained in accordance with the American Association for  
339 Accreditation of Laboratory Animal Care standards and The *Guide for the Care and Use*  
340 *of Laboratory Animals* (43). For sample collections, animals were sedated with ketamine

341 HCl (Parke-Davis) injected at 10 mg/kg body weight. EDTA-anticoagulated blood was  
342 collected via peripheral venipuncture. Plasma was separated from whole blood by  
343 centrifugation, and PBMCs were isolated by density gradient centrifugation using  
344 Ficoll<sup>®</sup>-Paque (Sigma) or Lymphocyte Separation Medium (MP Biomedicals). All  
345 protocols were reviewed and approved by the University of California at Davis  
346 Institutional Animal Care and Use Committee (IACUC) prior to the initiation of the study.

347

348 **SHIV challenge of infant and adult monkeys.** The generation of  
349 SHIV.C.CH505.375H.dCT has been previously described (20). The  
350 SHIV.C.CH505.375H.dCT challenge stock (provided by Dr. George M. Shaw, University  
351 of Pennsylvania) was prepared by infecting primary activated Indian rhesus macaque  
352 CD4+ T cells and 7-14 days later culture supernatants were pooled, as previously  
353 described (20). Virus titers were determined in TZM-bl cells, yielding  $6.8 \times 10^6$  TCID<sub>50</sub>/ml.

354

355 Twelve adult monkeys were challenged intravenously with SHIV.C.CH505 at a  
356 dose of  $3.4 \times 10^5$  TCID<sub>50</sub> (Table 1). Six infants were challenged orally beginning at 4  
357 weeks of age. Initially, infants were exposed to SHIV.C.CH505 three times per day for 5  
358 days with at a dose of  $8.5 \times 10^4$  TCID<sub>50</sub>/ml in an isotonic sucrose solution and bottle-fed, in  
359 order to simulate oral acquisition via breastfeeding. After one week, only one infant  
360 became infected, and the remaining five infants were challenged three weeks later  
361 under sedation at a dose of  $6.8 \times 10^5$  TCID<sub>50</sub>/ml until infected. After three weeks one  
362 infant remain uninfected and thus was subsequently challenged at an increasing dose  
363 ( $3.4 \times 10^6$  TCID<sub>50</sub>/ml) until infected (Table 1).



364 **Viral RNA load quantification.** Plasma RNA load was quantified using a well-  
365 established quantitative reverse transcriptase (RT) PCR assay targeting SIVgag RNA, as  
366 previously described (18). RNA was isolated from plasma samples using the  
367 QIA Symphony Virus/Bacteria Midi kit on the QIA Symphony SP automated sample  
368 preparation platform (Qiagen, Hilden, Germany). RNA was extracted manually if plasma  
369 volumes were limited. Data reported are the number of SIV RNA copy equivalents per ml  
370 of plasma, with a limit of detection of 15 copies/ ml.

371 **Lymphocyte counts.** Absolute lymphocyte counts in blood were calculated using the  
372 PBMC counts obtained by automated complete blood counts, multiplied by the  
373 lymphocyte percentages.

374 **Enzyme-Linked Immunosorbent Assay (ELISA), recombinant protein and soluble**  
375 **CD4 blocking.** Env-binding IgG was assessed in plasma in a 384-well plate format. The  
376 plates were coated overnight with HIV CH505 gp120 (30 ng/well) or MN gp41 (3 µg/ml)  
377 and then blocked with the assay diluent (phosphate-buffered saline containing 4%  
378 whey, 15% normal goat serum, and 0.5% Tween 20). Serially diluted plasma were then  
379 added to the plates and incubated for 1 hour, followed by detection with a horseradish  
380 peroxidase (HRP)-conjugated antibody, polyclonal goat anti-monkey IgG (Rockland  
381 Immunochemicals). The plates were developed by using the ABTS-2 peroxidase  
382 substrate system (KPL). The monoclonal antibody, b12R1, was used to develop  
383 standard curves, and the concentration of IgG antibody was calculated relative to the  
384 standard using a 5-parameter fit curve (SoftMax Pro 7). For monoclonal antibodies,

385 effective concentration 50% (EC50) was calculated by the concentration of antibody  
386 which resulted in a 50% reduction in optical density (OD) from the maximum value.

387 For CD4 blocking ELISAs, 384-well plates (Corning Life Sciences) were coated  
388 with C.1086 gp120 at 30ng/well. Following the same steps as previously stated, plates  
389 were blocked with assay diluent and serially diluted monoclonal antibody and plasma  
390 were added, and incubated for 1 hour. Soluble CD4 (sCD4) (NIH AIDS Reagent  
391 Program, Division of AIDS, NIAID, NIH: Human Soluble CD4 Recombinant Protein  
392 (sCD4) from Progenics) was then added at concentration of 0.64 µg/mL. The sCD4  
393 binding was detected using a biotinylated Human anti-CD4 (Thermo Fisher Scientific)  
394 followed by HRP-conjugated Streptavidin. Percent sCD4 binding inhibition was  
395 calculated as follows:  $100 - (\text{average of sera duplicate OD} / \text{average of negative control}$   
396  $\text{OD}) \times 100$ . OD referring to optical density. A reduction of absorbance by >50% by Abs  
397 present in plasma indicated blocking of sCD4 binding to C.1086 gp120.

398

399 **Binding Antibody Multiplex Assay (BAMA).** HIV-1 epitope specificity and breadth  
400 were determined using BAMA, as previously described (10). HIV-1 antigens were  
401 conjugated to polystyrene beads (Bio-Rad) as previously described (18), then binding of  
402 IgG to the bead-conjugated HIV-1 antigens was measured in plasma samples from the  
403 infant and adult monkey cohorts. The positive control was purified IgG from a pooled  
404 plasma of HIV Env-vaccinated rhesus macaques (RIVIG) (44). The conjugated beads  
405 were incubated on filter plates (Millipore) for approximately 30 minutes before plasma  
406 samples were added. The plasma samples were diluted in assay diluent (1% dry milk +  
407 5% goat serum + 0.05% tween-20 in 1X phosphate buffer saline, pH 7.4.) at a 1:500-

408 point dilution. Beads and diluted samples were incubated for 30 minutes, then IgG  
409 binding was detected using a PE-conjugated mouse anti-monkey IgG (Southern  
410 Biotech) at 4 µg/mL. The beads were washed and acquired on a Bio-Plex 200  
411 instrument (Bio-Rad) and IgG binding was expressed as mean fluorescence intensity  
412 (MFI). To assess assay background, the MFI of binding to wells that did not contain  
413 beads or sample (blank wells) and non-specific binding of the samples to unconjugated  
414 blank beads were evaluated during assay analysis. High background detection for  
415 plasma samples were noted and repeated if necessary. An HIV-envelope specific  
416 antibody response was considered positive if above the lower limit of detection (100  
417 MFI). To check for consistency between assays, the EC50 and maximum MFI values of  
418 the positive control (RIVIG) was tracked by Levy-Jennings charts. The antigens  
419 conjugated to the polystyrene beads are as follows: C. 1086 gp140, C.1086 gp120,  
420 A1.Con\_env03 gp140, A233 gp120, B.Con\_env03 gp140, Con6 gp120, ConC gp120,  
421 MN gp120, Linear V2. B, V3.C, C5.2.C, C1, conformational V1V2, ConC V3, and MN  
422 V3, and C. 1086 V1V2 (Table S1).

423

424 **Linear peptide microarray mapping and data analysis.** Solid phase peptide  
425 microarray epitope mapping was performed as previously described (45), with minor  
426 modifications. Briefly, array JPT Peptide Technologies GmbH (Germany) prepare arrays  
427 slides by printing a library designed by Dr. B. Korber, Los Alamos National Laboratory,  
428 onto Epoxy glass slides (PolyAn GmbH, Germany). The library contains 15-mer  
429 peptides overlapping by 12, covering consensus Env (gp160) clade A, B, C, D, Group  
430 M, CRF1, and CRF2 and vaccine strains (gp120) 1.A244, 1.TH023, MN, C.1086,

431 C.TV1, and C.ZM651. To assess CH505-specific responses, a peptide library  
432 containing 59 CH505 strains (gp120, gp145, gp160, and SOSIP, sequences provided  
433 by Dr. Barton Haynes, Duke University) was also designed (20). Sera were diluted 1/50  
434 and applied to the peptide array, followed by washing and detection using goat anti-  
435 human IgG-Alexa Fluor 647. Array slides were scanned at a wavelength of 635 nm with  
436 an InnoScan 710 AL scanner (Innopsys, France) using XDR mode. Scan images were  
437 analyzed using MagPix 8.0 software to obtain binding intensity values for all peptides.  
438 Microarray data were then processing using R package pepStat (46) to obtain binding  
439 signal for each peptide, which is defined as  $\log_2(\text{Intensity of 12 wpi sample}/\text{intensity of}$   
440  $\text{matched baseline sample})$ . Binding magnitude to each identified epitope is defined as  
441 the highest binding signal by a single peptide within the epitope region.

442

443 **Neutralization assays.** Neutralization by antibodies in plasma of  
444 MW965.LucR.T2A.ecto/293T IMC (clade C, tier 1), CH505 w4.3 HIV-1 pseudovirus  
445 (clade C, tier 1a), and autologous CH505.TF (clade C, tier 2) HIV-1 pseudovirus was  
446 measured in TZM-bl cells (NIH AIDS Reagent Program, Division of AIDS, NIAID, NIH;  
447 from John Kappes) via a reduction in luciferase reporter gene expression after a single  
448 round of infection as previously described (47-49). Prior to screening, plasma was  
449 heated-inactivated at 56°C for 30 min. Luminescence was measured using a Victor X3  
450 multilabel plate reader, 1 s per well (PerkinElmer). The ID<sub>50</sub> was calculated as the  
451 dilution that resulted in a 50% reduction in relative luminescence units (RLU) compared  
452 to virus control wells. The monoclonal antibody, b12R1, was used as a positive control  
453 for MW965 assays, and VRC01 was used a positive control for all other assays.

454 **ADCC.** The ADCC-GTL assay was used to measure plasma ADCC activity as  
455 previously described (50). Briefly, CEM.NKRCCR5 target cells (NIH AIDS Reagent  
456 Program, Division of AIDS, NIAID, NIH; from Alexandra Trkola) (51) were coated with  
457 recombinant CH505 or 1086.C K160N gp120. Cryopreserved human peripheral blood  
458 mononuclear cells (PBMCs) from an HIV-1 seronegative donor with the heterozygous  
459 158 F/V genotype for the Fcγ receptor IIIa were used as the source of effector cells (52,  
460 53). Adult and infant plasma samples were tested after a 4-fold serial dilution starting at  
461 1:100. ADCC was measured as percent Granzyme B (GzB) activity, defined as the  
462 frequency of target cells positive for proteolytically active GzB out of the total viable  
463 target cell population. Final results are expressed after subtraction of the background  
464 GzB activity observed in wells containing target and effector cells in the absence of  
465 plasma. ADCC endpoint titers were determined by interpolating the last positive dilution  
466 of plasma (>8% GzB activity).

467

468 **CH505 envelope-specific memory B cell phenotyping.** For phenotyping of CH505  
469 Env-specific memory B cells, suspension of  $10^6$  PBMCs were blocked with 6.25 μg/ml  
470 anti-human CD4 antibody (BD Biosciences) at 4°C for 15 min. After incubation, PBMCs  
471 were washed twice with PBS, and pelleted at 1500 rpm for 5 min. PBMCs were then  
472 incubated at 4°C with LIVE/DEAD Fixable Aqua Dead Cell Stain Kit (Thermo Fisher  
473 Scientific) for 30 minutes. Following incubation and wash with PBS, PBMCs were then  
474 stained with a cocktail of fluorescently conjugated antibodies for surface markers  
475 including CD20, CD3, IgM, CD16, CD8, IgD PE, CD14 and CD27 (Table S2) and

476 custom-conjugated BV421-HIV-1 gp120 (C.CH505 T/F) and AF647-HIV-1 gp120  
477 (C.CH505 T/F) prepared as described previously (54). The stained PBMCs were  
478 acquired on an LSRII flow cytometer (BD Biosciences) using BD FACS Diva software,  
479 and analyzed with FlowJo software version 10. The following gating strategy was  
480 applied: lymphocytes were gated on singlets and live cells were selected to gate on  
481 CD3<sup>-</sup> cells (T cells), CD14<sup>-</sup> cells (monocytes/macrophages), and CD20<sup>+</sup> cells (B cells).  
482 B cells were further gated on CD27<sup>+</sup> memory B cells. Only B cells positive for both  
483 BV421-gp120 and AF647-gp120 were considered CH505-Env specific. For a detailed  
484 list of antibodies used for B cell phenotyping, see Table S2.

485 **Lymph node Tfh phenotyping and Activation-Induced Marker (AIM) Assay.** The  
486 AIM assay was based on previous work (55). Briefly, cryopreserved rhesus macaque  
487 lymph node cells (12 wpi) were thawed, rested for 3h at 37°C/5% CO<sub>2</sub>, re-suspended in  
488 AIM V medium (Gibco), and transferred to wells of a 24-well plate at 10<sup>6</sup> cells per well.  
489 Cells were cultured for 18 hr at 37°C/5% CO<sub>2</sub> with no exogenous stimulation or with  
490 gp140 stimulation (5 µg/ml CH505 T/F gp140 protein and 0.5 µg/ml of a 15-mer peptide  
491 pool with 11-residue overlap spanning CH505 T/F gp140). As a positive control, cells  
492 were stimulated with 0.5 µg/ml Staphylococcal enterotoxin B (SEB) (Sigma). Duplicates  
493 of each condition were performed when cell numbers permitted. Following stimulation,  
494 cells were labeled with fluorescently labelled antibodies to the following surface  
495 antigens: PD-1, CD8a, CD25, CD4, CD20, CD69, CD137, CD196, OX40, CD183, CD3,  
496 CD45RA, and CD185. For Tfh phenotyping the following gating strategy was applied:  
497 lymphocytes were gated on singlets and live cells were selected to gate on CD4<sup>+</sup>  
498 CXCR5<sup>+</sup> Foxp3<sup>-</sup> cells, followed by gating on CCR6 and CXCR3. Cell viability was

499 measured using Live/Dead Fix Aqua stain (eBioscience). Flow cytometry data were  
500 acquired on a LSRII running FACSDiva software (BD Biosciences) and analyzed on  
501 FlowJo (FlowJo). For a detailed list of antibodies used for phenotyping see Table S2,  
502 and for the AIM assay gating strategy see Figure S2.

503 **Statistical Methods.** Immune assay measurements at various time points post-  
504 infection and the change in immune assay measurements from baseline were  
505 compared between SHIV-infected infant and adult monkeys using Wilcoxon rank sum  
506 tests with exact p-values. Spearman's rank correlation coefficients were estimated for  
507 the cohort as a whole as well as by adult monkeys and infants separately. All  
508 correlations were tested with exact p-values to assess whether any were significantly  
509 different from zero. To adjust for multiple comparisons, the Benjamini–Hochberg (BH)  
510 procedure was used to control the false discovery rate (FDR). Separate adjustments to  
511 control the FDR at  $\alpha = 0.05$  were performed for comparisons between the infant and  
512 adult monkeys using: 1) the pre-specified primary endpoints for a total of 26 tests (Table  
513 S3); 2) the pre-specified secondary endpoints for a total of 43 tests (Table S4); 3)  
514 correlations between pre-specified parameters and CH505.TF neutralization at 12 wpi  
515 for a total of 60 tests (Table S5); and 4) correlations between pre-specified parameters  
516 and ADCC - %Grz B activity at 10 weeks post-infection for a total of 15 tests (Table S6).  
517 Both the unadjusted (raw\_p) and FDR-adjusted (FDR\_p) p-values are reported in  
518 Tables S3-S6. All statistical tests were performed using SAS version 9.4 (Cary, NC,  
519 USA).

520 **Acknowledgements:** The work was supported by National Institutes of Health grants  
521 P01 AI117915 (S.R.P and K.D.P); T32 CA911139 (A.N.N); 5R01 AI106380 (S.R.P);  
522 and 5R01-DE025444 (S.R.P). This work was also supported by the Penn Center for  
523 AIDS Research Viral and Molecular Core P30 AI045008 (K.B.); the BEAT-HIV: Delaney  
524 Collaboratory to Cure HIV-1 Infection by Combination Immunotherapy UM1AI126620  
525 (K.B.); and CARE: Delaney Collaboratory for AIDS Eradication UM1AI126619 (K.B.).

526 We would like to thank Dr. George Shaw, University of Pennsylvania Department of  
527 Medicine, Philadelphia, PA for providing us with SHIV.C.CH505.375H.dCT. Protein  
528 antigens for BAMAs and ELISAs were generously provided by Kevin Saunders and  
529 Barton Haynes, supported by NIH NIAID Division of AIDS UM1 grantAI100645 for the  
530 Center for HIV/AIDS Vaccine Immunology-Immunogen Discovery (CHAVI-ID), and  
531 produced at the DHVI Protein Production Facility. Study data were collected and  
532 managed using REDCap (Research Electronic Data Capture) electronic data capture  
533 tools hosted at Duke University.

534  
535 The authors thank Jeff Lifson, Rebecca Shoemaker and colleagues in the Quantitative  
536 Molecular Diagnostics Core of the AIDS and Cancer Virus Program of the Frederick  
537 National Laboratory for expert assistance with viral load measurements. We would also  
538 like to thank J. Watanabe, J. Usachenko, A. Ardeshir and the staff of the CNPRC  
539 Colony Research Services for their support in these studies. We thank Dr. Georgia  
540 Tomaras' laboratory for technical support with linear epitope mapping microarray, and  
541 R. Whitney Edwards for performing ADCC assays. Flow cytometry was performed in the  
542 Duke Human Vaccine Institute Flow Cytometry Facility (Durham, NC). We are also



543 thankful for statistical support for this study provided by the Center for AIDS Research  
544 at the University of North Carolina at Chapel Hill, an NIH-funded program (P30  
545 AI50410). The funders had no role in study design, data collection and interpretation, or  
546 the decision to submit the work for publication. The content is solely the responsibility of  
547 the authors and does not necessarily represent the official views of the National  
548 Institutes of Health.

549

## 550 **Figure Legends**

551 **Figure 1. Plasma viral load and CD4+ T cell frequencies adult and infant monkeys**  
552 **following SHIV.C.CH505 infection.** (A) Plasma viral loads were monitored weekly or  
553 bi-weekly through 12 wpi. Automated complete blood counts were collected weekly and  
554 (B) Proportion and (C) absolute counts per ml of blood of CD4+ T cells were  
555 determined. Blue lines represent adult monkeys, while red lines represent infant  
556 monkeys. Each line represents one animal.

557 **Figure 2. The kinetics and magnitude of HIV Env-specific IgG responses are**  
558 **similar in infant and adult monkeys during acute SHIV.C.CH505 infection.** HIV  
559 CH505 gp120- (A) and MN gp41-specific (B) IgG responses in the plasma of adult (blue  
560 circles) and infant (red squares) monkeys through 12 wpi are shown. Statistical analysis  
561 was performed using Wilcoxon rank sum tests with exact p-values to compare IgG  
562 responses between SHIV-infected infant and adult monkeys, followed by adjustments  
563 for multiple comparisons. \*unadjusted  $p < 0.05$ . All p-values are  $> 0.05$  once adjusted for

564 multiple comparisons (See Table S3 for both unadjusted p and FDR\_p for all  
565 comparisons) Medians are indicated as black horizontal lines on the dot plots.

566 **Figure 3. Similar specificity of Env-specific IgG responses during acute**  
567 **SHIV.C.CH505 infection in infants and adults.** Plasma IgG specificity against a panel  
568 of HIV Env linear and conformational epitopes at week 4 (A) and week 12 (B) post-  
569 infection. (C) Plasma blocking of soluble CD4-gp120 interactions at week 3 and 12 post-  
570 infection. Adult monkeys are represented by blue circles, and infant monkeys are  
571 represented by red squares. Medians are indicated as horizontal lines on the dot plots.

572 **Figure 4. Adult and infant monkeys developed a similar breadth in gp120 and**  
573 **gp140 IgG responses during acute SHIV.C.CH505 infection.** Cross-clade HIV gp120  
574 and gp140 IgG breadth at week 4 (A) and week 12 (B) post-infection. Adult monkeys  
575 are represented by blue circles, and infant monkeys are represented by red squares.  
576 Medians are indicated as horizontal lines on the dot plots.

577 **Figure 5: Frequency of Follicular T helper cells (Tfh) in the lymph node of**  
578 **SHIV.C.CH505-infected infant and adult monkeys at 12 wpi.** Proportions of (A)  
579 CH505-specific and (B) CXCR5<sup>hi</sup> PD1<sup>hi</sup> Tfh cells. Proportions of Tfh subsets (C)  
580 CXCR3<sup>+</sup> Tfh1, (D) CXCR3<sup>-</sup> CCR6<sup>-</sup> Tfh2, and (E) CCR6<sup>+</sup> Tfh17 cells. Each data point  
581 represents one animal, and medians are indicated as horizontal lines. FDR adjusted p-  
582 values are reported in the graphs, FDR\_p <0.05 was considered significant. See Tables  
583 S3 and S4 for both unadjusted p and FDR\_p for all comparisons.

584 **Figure 6: Similar proportion of systemic and lymph node B cell subsets in**  
585 **SHIV.C.CH505-infected infant and adult RMs.** (A) Absolute counts of memory B cells

586 (CD14- CD16- CD20+ IgD- CD27 all)/ ml of blood and (B) frequency of CH505 gp120-  
587 specific memory B cells of total memory B cells. GC B cells were identified as CD20+  
588 BCL6+ Ki67+ cells (C), and the frequency of (D) CD3- CD20+ B cells and (E) CD20+  
589 Bcl6+ Ki67+ GC B cells in the lymph node at 12 wpi are shown. Each data point  
590 represents one animal, and medians are indicated as horizontal lines. FDR adjusted p-  
591 values are reported in the graphs, FDR\_p <0.05 was considered significant. See Table  
592 S4 for both unadjusted p and FDR\_p for all comparisons.

593

594 **Figure 7. Magnitude and kinetics of plasma neutralization responses during acute**  
595 **SHIV.C.CH505 infection of infant and adult monkeys.** The TZM-bl cell-based assay  
596 was performed to assess the neutralization activity of plasma antibodies. Tier 1  
597 neutralization responses were evaluated against MW965 (A) and CH505 w4.3 (B)  
598 through 12 wpi. (C) Autologous virus neutralization titers against CH505 T/F. Each dot  
599 represents plasma neutralization of one monkey, and medians are indicated as  
600 horizontal lines.

601 **Figure 8. Similar ADCC activity of plasma antibodies of SHIV.C.CH505-infected**  
602 **infant and adult monkeys.** ADCC activity was measured at weeks 0, 6, and 10 post-  
603 infection against CH505 gp120-coated target cells. The maximum granzyme B activity  
604 (A) and plasma dilution endpoint antibody titers (B) for each animal are shown. Medians  
605 are indicated as horizontal lines. See Table S3 for both unadjusted p and FDR\_p for all  
606 comparisons

607 **Figure 9. Viral load at 12 wpi is associated with the development of autologous**  
608 **neutralization.** Correlations between CH505 T/F neutralization at 12 wpi and (A)  
609 plasma viral load at 12 wpi, (B) CH505 gp120 IgG at 12 wpi, (C) ADCC activity at 10  
610 wpi, and (D) frequency of CH505-specific Tfh cells at 12 wpi. The coefficients of  
611 correlations ( $\rho$ ;  $\rho$ ) and p values from testing whether the correlation coefficient differed  
612 significantly from 0 are shown on the graphs. See Tables S5 and S6, and Figures S3  
613 and S4 for a complete list of immune parameters tested and correlation coefficients with  
614 both unadjusted p and FDR\_p.

615

## 616 References

- 617 1. **UNAIDS.** 2017. UNAIDS Global Fact Sheet. UNAIDS,
- 618 2. **UNAIDS.** 2016. Global Plan towards the elimination of new HIV infections among children by  
619 2015 and keeping their mothers alive. UNAIDS G, Switzerland,
- 620 3. **Martinez DR, Permar SR, Fouda GG.** 2016. Contrasting Adult and Infant Immune Responses to  
621 HIV Infection and Vaccination. *Clin Vaccine Immunol* **23**:84-94.
- 622 4. **Richardson BA, Mbori-Ngacha D, Lavreys L, John-Stewart GC, Nduati R, Panteleeff DD, Emery  
623 S, Kreiss JK, Overbaugh J.** 2003. Comparison of human immunodeficiency virus type 1 viral loads  
624 in Kenyan women, men, and infants during primary and early infection. *J Virol* **77**:7120-7123.
- 625 5. **Muenchhoff M, Prendergast AJ, Goulder PJ.** 2014. Immunity to HIV in Early Life. *Front Immunol*  
626 **5**:391.
- 627 6. **Becquet R, Marston M, Dabis F, Moulton LH, Gray G, Coovadia HM, Essex M, Ekouevi DK,  
628 Jackson D, Coutoudis A, Kilewo C, Leroy V, Wiktor SZ, Nduati R, Msellati P, Zaba B, Ghys PD,  
629 Newell ML, Group UCS.** 2012. Children who acquire HIV infection perinatally are at higher risk of  
630 early death than those acquiring infection through breastmilk: a meta-analysis. *PLoS One*  
631 **7**:e28510.
- 632 7. **Marinda E, Humphrey JH, Iliff PJ, Mutasa K, Nathoo KJ, Piwoz EG, Moulton LH, Salama P, Ward  
633 BJ, Group ZS.** 2007. Child mortality according to maternal and infant HIV status in Zimbabwe.  
634 *Pediatr Infect Dis J* **26**:519-526.
- 635 8. **Marston M, Becquet R, Zaba B, Moulton LH, Gray G, Coovadia H, Essex M, Ekouevi DK, Jackson  
636 D, Coutoudis A, Kilewo C, Leroy V, Wiktor S, Nduati R, Msellati P, Dabis F, Newell ML, Ghys  
637 PD.** 2011. Net survival of perinatally and postnatally HIV-infected children: a pooled analysis of  
638 individual data from sub-Saharan Africa. *Int J Epidemiol* **40**:385-396.
- 639 9. **Ferrand RA, Corbett EL, Wood R, Hargrove J, Ndhlovu CE, Cowan FM, Gouws E, Williams BG.**  
640 2009. AIDS among older children and adolescents in Southern Africa: projecting the time course  
641 and magnitude of the epidemic. *AIDS* **23**:2039-2046.

- 642 10. **Tomaras GD, Yates NL, Liu P, Qin L, Fouda GG, Chavez LL, Decamp AC, Parks RJ, Ashley VC,**  
643 **Lucas JT, Cohen M, Eron J, Hicks CB, Liao HX, Self SG, Landucci G, Forthal DN, Weinhold KJ,**  
644 **Keele BF, Hahn BH, Greenberg ML, Morris L, Karim SS, Blattner WA, Montefiori DC, Shaw GM,**  
645 **Perelson AS, Haynes BF.** 2008. Initial B-cell responses to transmitted human immunodeficiency  
646 virus type 1: virion-binding immunoglobulin M (IgM) and IgG antibodies followed by plasma  
647 anti-gp41 antibodies with ineffective control of initial viremia. *J Virol* **82**:12449-12463.
- 648 11. **Pollack H, Zhan MX, Ilmet-Moore T, Ajuang-Simbiri K, Krasinski K, Borkowsky W.** 1993.  
649 Ontogeny of anti-human immunodeficiency virus (HIV) antibody production in HIV-1-infected  
650 infants. *Proc Natl Acad Sci U S A* **90**:2340-2344.
- 651 12. **Henrard D, Fauvel M, Samson J, Delage G, Boucher M, Hankins C, Stephens J, Lapointe N.**  
652 1993. Ontogeny of the humoral immune response to human immunodeficiency virus type 1 in  
653 infants. *J Infect Dis* **168**:288-291.
- 654 13. **Goo L, Chohan V, Nduati R, Overbaugh J.** 2014. Early development of broadly neutralizing  
655 antibodies in HIV-1-infected infants. *Nat Med* **20**:655-658.
- 656 14. **Simonich CA, Williams KL, Verkerke HP, Williams JA, Nduati R, Lee KK, Overbaugh J.** 2016. HIV-  
657 1 Neutralizing Antibodies with Limited Hypermutation from an Infant. *Cell* **166**:77-87.
- 658 15. **Muenchhoff M, Adland E, Karimanzira O, Crowther C, Pace M, Csala A, Leitman E, Moonsamy**  
659 **A, McGregor C, Hurst J, Groll A, Mori M, Sinmyee S, Thobakgale C, Tudor-Williams G,**  
660 **Prendergast AJ, Klooverpris H, Roider J, Leslie A, Shingadia D, Brits T, Daniels S, Frater J,**  
661 **Willberg CB, Walker BD, Ndung'u T, Jooste P, Moore PL, Morris L, Goulder P.** 2016.  
662 Nonprogressing HIV-infected children share fundamental immunological features of  
663 nonpathogenic SIV infection. *Sci Transl Med* **8**:358ra125.
- 664 16. **Milligan C, Richardson BA, John-Stewart G, Nduati R, Overbaugh J.** 2015. Passively acquired  
665 antibody-dependent cellular cytotoxicity (ADCC) activity in HIV-infected infants is associated  
666 with reduced mortality. *Cell Host Microbe* **17**:500-506.
- 667 17. **Broliden K, Sievers E, Tovo PA, Moschese V, Scarlatti G, Broliden PA, Fundaro C, Rossi P.** 1993.  
668 Antibody-dependent cellular cytotoxicity and neutralizing activity in sera of HIV-1-infected  
669 mothers and their children. *Clin Exp Immunol* **93**:56-64.
- 670 18. **Li H, Wang S, Kong R, Ding W, Lee FH, Parker Z, Kim E, Learn GH, Hahn P, Policicchio B, Brocca-**  
671 **Cofano E, Deleage C, Hao X, Chuang GY, Gorman J, Gardner M, Lewis MG, Hatziioannou T,**  
672 **Santra S, Apetrei C, Pandrea I, Alam SM, Liao HX, Shen X, Tomaras GD, Farzan M, Chertova E,**  
673 **Keele BF, Estes JD, Lifson JD, Doms RW, Montefiori DC, Haynes BF, Sodroski JG, Kwong PD,**  
674 **Hahn BH, Shaw GM.** 2016. Envelope residue 375 substitutions in simian-human  
675 immunodeficiency viruses enhance CD4 binding and replication in rhesus macaques. *Proc Natl*  
676 *Acad Sci U S A* **113**:E3413-3422.
- 677 19. **Gao F, Bonsignori M, Liao HX, Kumar A, Xia SM, Lu X, Cai F, Hwang KK, Song H, Zhou T, Lynch**  
678 **RM, Alam SM, Moody MA, Ferrari G, Berrong M, Kelsoe G, Shaw GM, Hahn BH, Montefiori DC,**  
679 **Kamanga G, Cohen MS, Hraber P, Kwong PD, Korber BT, Mascola JR, Kepler TB, Haynes BF.**  
680 2014. Cooperation of B cell lineages in induction of HIV-1-broadly neutralizing antibodies. *Cell*  
681 **158**:481-491.
- 682 20. **Liao HX, Lynch R, Zhou T, Gao F, Alam SM, Boyd SD, Fire AZ, Roskin KM, Schramm CA, Zhang Z,**  
683 **Zhu J, Shapiro L, Program NCS, Mullikin JC, Gnanakaran S, Hraber P, Wiehe K, Kelsoe G, Yang**  
684 **G, Xia SM, Montefiori DC, Parks R, Lloyd KE, Searce RM, Soderberg KA, Cohen M, Kamanga G,**  
685 **Louder MK, Tran LM, Chen Y, Cai F, Chen S, Moquin S, Du X, Joyce MG, Srivatsan S, Zhang B,**  
686 **Zheng A, Shaw GM, Hahn BH, Kepler TB, Korber BT, Kwong PD, Mascola JR, Haynes BF.** 2013.  
687 Co-evolution of a broadly neutralizing HIV-1 antibody and founder virus. *Nature* **496**:469-476.

- 688 21. **Abel K, Pahar B, Van Rompay KK, Fritts L, Sin C, Schmidt K, Colon R, McChesney M, Marthas**  
689 **ML.** 2006. Rapid virus dissemination in infant macaques after oral simian immunodeficiency  
690 virus exposure in the presence of local innate immune responses. *J Virol* **80**:6357-6367.
- 691 22. **Marthas ML, Van Rompay KK, Abbott Z, Earl P, Buonocore-Buzzelli L, Moss B, Rose NF, Rose JK,**  
692 **Kozlowski PA, Abel K.** 2011. Partial efficacy of a VSV-SIV/MVA-SIV vaccine regimen against oral  
693 SIV challenge in infant macaques. *Vaccine* **29**:3124-3137.
- 694 23. **Marthas ML, van Rompay KK, Otsyula M, Miller CJ, Canfield DR, Pedersen NC, McChesney MB.**  
695 1995. Viral factors determine progression to AIDS in simian immunodeficiency virus-infected  
696 newborn rhesus macaques. *J Virol* **69**:4198-4205.
- 697 24. **Van Rompay KK, Greenier JL, Cole KS, Earl P, Moss B, Steckbeck JD, Pahar B, Rourke T,**  
698 **Montelaro RC, Canfield DR, Tarara RP, Miller C, McChesney MB, Marthas ML.** 2003.  
699 Immunization of newborn rhesus macaques with simian immunodeficiency virus (SIV) vaccines  
700 prolongs survival after oral challenge with virulent SIVmac251. *J Virol* **77**:179-190.
- 701 25. **Bohm RP, Jr., Martin LN, Davison-Fairburn B, Baskin GB, Murphey-Corb M.** 1993. Neonatal  
702 disease induced by SIV infection of the rhesus monkey (*Macaca mulatta*). *AIDS Res Hum*  
703 *Retroviruses* **9**:1131-1137.
- 704 26. **Roider J, Maehara T, Ngoepe A, Ramsuran D, Muenchhoff M, Adland E, Aicher T, Kazer SW,**  
705 **Jooste P, Karim F, Kuhn W, Shalek AK, Ndung'u T, Morris L, Moore PL, Pillai S, Klooverpris H,**  
706 **Goulder P, Leslie A.** 2018. High-Frequency, Functional HIV-Specific T-Follicular Helper and  
707 Regulatory Cells Are Present Within Germinal Centers in Children but Not Adults. *Front Immunol*  
708 **9**:1975.
- 709 27. **Arendrup M, Nielsen C, Hansen JE, Pedersen C, Mathiesen L, Nielsen JO.** 1992. Autologous HIV-  
710 1 neutralizing antibodies: emergence of neutralization-resistant escape virus and subsequent  
711 development of escape virus neutralizing antibodies. *J Acquir Immune Defic Syndr* **5**:303-307.
- 712 28. **Aasa-Chapman MM, Hayman A, Newton P, Cornforth D, Williams I, Borrow P, Balfe P,**  
713 **McKnight A.** 2004. Development of the antibody response in acute HIV-1 infection. *AIDS* **18**:371-  
714 381.
- 715 29. **Li B, Decker JM, Johnson RW, Bibollet-Ruche F, Wei X, Mulenga J, Allen S, Hunter E, Hahn BH,**  
716 **Shaw GM, Blackwell JL, Derdeyn CA.** 2006. Evidence for potent autologous neutralizing  
717 antibody titers and compact envelopes in early infection with subtype C human  
718 immunodeficiency virus type 1. *J Virol* **80**:5211-5218.
- 719 30. **Tang H, Robinson JE, Gnanakaran S, Li M, Rosenberg ES, Perez LG, Haynes BF, Liao HX,**  
720 **Labranche CC, Korber BT, Montefiori DC.** 2011. epitopes immediately below the base of the V3  
721 loop of gp120 as targets for the initial autologous neutralizing antibody response in two HIV-1  
722 subtype B-infected individuals. *J Virol* **85**:9286-9299.
- 723 31. **Wei X, Decker JM, Wang S, Hui H, Kappes JC, Wu X, Salazar-Gonzalez JF, Salazar MG, Kilby JM,**  
724 **Saag MS, Komarova NL, Nowak MA, Hahn BH, Kwong PD, Shaw GM.** 2003. Antibody  
725 neutralization and escape by HIV-1. *Nature* **422**:307-312.
- 726 32. **Frost SD, Wrin T, Smith DM, Kosakovsky Pond SL, Liu Y, Paxinos E, Chappey C, Galovich J,**  
727 **Beauchaine J, Petropoulos CJ, Little SJ, Richman DD.** 2005. Neutralizing antibody responses  
728 drive the evolution of human immunodeficiency virus type 1 envelope during recent HIV  
729 infection. *Proc Natl Acad Sci U S A* **102**:18514-18519.
- 730 33. **Bonsignori M, Pollara J, Moody MA, Alpert MD, Chen X, Hwang KK, Gilbert PB, Huang Y,**  
731 **Gurley TC, Kozink DM, Marshall DJ, Whitesides JF, Tsao CY, Kaewkungwal J, Nitayaphan S,**  
732 **Pitisuttithum P, Rerks-Ngarm S, Kim JH, Michael NL, Tomaras GD, Montefiori DC, Lewis GK,**  
733 **DeVico A, Evans DT, Ferrari G, Liao HX, Haynes BF.** 2012. Antibody-dependent cellular  
734 cytotoxicity-mediating antibodies from an HIV-1 vaccine efficacy trial target multiple epitopes  
735 and preferentially use the VH1 gene family. *J Virol* **86**:11521-11532.



- 736 34. **Crotty S.** 2011. Follicular helper CD4 T cells (TFH). *Annu Rev Immunol* **29**:621-663.
- 737 35. **Schmitt N, Bentebibel SE, Ueno H.** 2014. Phenotype and functions of memory Tfh cells in  
738 human blood. *Trends Immunol* **35**:436-442.
- 739 36. **Velu V, Mylvaganam G, Ibegbu C, Amara RR.** 2018. Tfh1 Cells in Germinal Centers During  
740 Chronic HIV/SIV Infection. *Front Immunol* **9**:1272.
- 741 37. **Velu V, Mylvaganam GH, Gangadhara S, Hong JJ, Iyer SS, Gumber S, Ibegbu CC, Villinger F,**  
742 **Amara RR.** 2016. Induction of Th1-Biased T Follicular Helper (Tfh) Cells in Lymphoid Tissues  
743 during Chronic Simian Immunodeficiency Virus Infection Defines Functionally Distinct Germinal  
744 Center Tfh Cells. *J Immunol* **197**:1832-1842.
- 745 38. **Baiyegunhi O, Ndlovu B, Ogunshola F, Ismail N, Walker BD, Ndung'u T, Ndhlovu ZM.** 2018.  
746 Frequencies of Circulating Th1-Biased T Follicular Helper Cells in Acute HIV-1 Infection Correlate  
747 with the Development of HIV-Specific Antibody Responses and Lower Set Point Viral Load. *J Virol*  
748 **92**.
- 749 39. **Fouda GG, Cunningham CK, McFarland EJ, Borkowsky W, Muresan P, Pollara J, Song LY, Liebl**  
750 **BE, Whitaker K, Shen X, Vandergrift NA, Overman RG, Yates NL, Moody MA, Fry C, Kim JH,**  
751 **Michael NL, Robb M, Pitisuttithum P, Kaewkungwal J, Nitayaphan S, Rerks-Ngarm S, Liao HX,**  
752 **Haynes BF, Montefiori DC, Ferrari G, Tomaras GD, Permar SR.** 2015. Infant HIV type 1 gp120  
753 vaccination elicits robust and durable anti-V1V2 immunoglobulin G responses and only rare  
754 envelope-specific immunoglobulin A responses. *J Infect Dis* **211**:508-517.
- 755 40. **Haynes BF, Gilbert PB, McElrath MJ, Zolla-Pazner S, Tomaras GD, Alam SM, Evans DT,**  
756 **Montefiori DC, Karnasuta C, Sutthent R, Liao HX, DeVico AL, Lewis GK, Williams C, Pinter A,**  
757 **Fong Y, Janes H, DeCamp A, Huang Y, Rao M, Billings E, Karasavvas N, Robb ML, Ngauy V, de**  
758 **Souza MS, Paris R, Ferrari G, Bailer RT, Soderberg KA, Andrews C, Berman PW, Frahm N, De**  
759 **Rosa SC, Alpert MD, Yates NL, Shen X, Koup RA, Pitisuttithum P, Kaewkungwal J, Nitayaphan S,**  
760 **Rerks-Ngarm S, Michael NL, Kim JH.** 2012. Immune-correlates analysis of an HIV-1 vaccine  
761 efficacy trial. *N Engl J Med* **366**:1275-1286.
- 762 41. **Rerks-Ngarm S, Pitisuttithum P, Nitayaphan S, Kaewkungwal J, Chiu J, Paris R, Premrsri N,**  
763 **Namwat C, de Souza M, Adams E, Benenson M, Gurunathan S, Tartaglia J, McNeil JG, Francis**  
764 **DP, Stablein D, Birx DL, Chunsuttiwat S, Khamboonruang C, Thongcharoen P, Robb ML,**  
765 **Michael NL, Kunasol P, Kim JH, Investigators M-T.** 2009. Vaccination with ALVAC and AIDSVAX  
766 to prevent HIV-1 infection in Thailand. *N Engl J Med* **361**:2209-2220.
- 767 42. **McGuire EP, Fong Y, Toote C, Cunningham CK, McFarland EJ, Borkowsky W, Barnett S, Itell HL,**  
768 **Kumar A, Gray G, McElrath MJ, Tomaras GD, Permar SR, Fouda GG.** 2018. HIV-Exposed Infants  
769 Vaccinated with an MF59/Recombinant gp120 Vaccine Have Higher-Magnitude Anti-V1V2 IgG  
770 Responses than Adults Immunized with the Same Vaccine. *J Virol* **92**.
- 771 43. **National Research Council Committee for the Update of the Guide for the C, Use of Laboratory**  
772 **A.** 2011. The National Academies Collection: Reports funded by National Institutes of Health,  
773 Guide for the Care and Use of Laboratory Animals doi:10.17226/12910. National Academies  
774 Press (US)
- 775 National Academy of Sciences., Washington (DC).
- 776 44. **Phillips B, Fouda GG, Eudailey J, Pollara J, Curtis AD, 2nd, Kunz E, Dennis M, Shen X, Bay C,**  
777 **Hudgens M, Pickup D, Alam SM, Ardeshir A, Kozlowski PA, Van Rompay KKA, Ferrari G, Moody**  
778 **MA, Permar S, De Paris K.** 2017. Impact of Poxvirus Vector Priming, Protein Coadministration,  
779 and Vaccine Intervals on HIV gp120 Vaccine-Elicited Antibody Magnitude and Function in Infant  
780 Macaques. *Clin Vaccine Immunol* **24**.
- 781 45. **Shen X, Duffy R, Howington R, Cope A, Sadagopal S, Park H, Pal R, Kwa S, Ding S, Yang OO,**  
782 **Fouda GG, Le Grand R, Bolton D, Esteban M, Phogat S, Roederer M, Amara RR, Picker LJ, Seder**

- 783 **RA, McElrath MJ, Barnett S, Permar SR, Shattock R, DeVico AL, Felber BK, Pavlakis GN,**  
784 **Pantaleo G, Korber BT, Montefiori DC, Tomaras GD.** 2015. Vaccine-Induced Linear Epitope-  
785 Specific Antibodies to Simian Immunodeficiency Virus SIVmac239 Envelope Are Distinct from  
786 Those Induced to the Human Immunodeficiency Virus Type 1 Envelope in Nonhuman Primates. *J*  
787 *Virol* **89**:8643-8650.
- 788 46. **Gottardo R, Bailer RT, Korber BT, Gnanakaran S, Phillips J, Shen X, Tomaras GD, Turk E,**  
789 **Imholte G, Eckler L, Wenschuh H, Zerweck J, Greene K, Gao H, Berman PW, Francis D, Sinangil**  
790 **F, Lee C, Nitayaphan S, Rerks-Ngarm S, Kaewkungwal J, Pitisuttithum P, Tartaglia J, Robb ML,**  
791 **Michael NL, Kim JH, Zolla-Pazner S, Haynes BF, Mascola JR, Self S, Gilbert P, Montefiori DC.**  
792 2013. Plasma IgG to linear epitopes in the V2 and V3 regions of HIV-1 gp120 correlate with a  
793 reduced risk of infection in the RV144 vaccine efficacy trial. *PLoS One* **8**:e75665.
- 794 47. **Sarzotti-Kelsoe M, Bailer RT, Turk E, Lin CL, Bilaska M, Greene KM, Gao H, Todd CA, Ozaki DA,**  
795 **Seaman MS, Mascola JR, Montefiori DC.** 2014. Optimization and validation of the TZM-bl assay  
796 for standardized assessments of neutralizing antibodies against HIV-1. *J Immunol Methods*  
797 **409**:131-146.
- 798 48. **Li M, Gao F, Mascola JR, Stamatatos L, Polonis VR, Koutsoukos M, Voss G, Goepfert P, Gilbert**  
799 **P, Greene KM, Bilaska M, Kothe DL, Salazar-Gonzalez JF, Wei X, Decker JM, Hahn BH, Montefiori**  
800 **DC.** 2005. Human immunodeficiency virus type 1 env clones from acute and early subtype B  
801 infections for standardized assessments of vaccine-elicited neutralizing antibodies. *J Virol*  
802 **79**:10108-10125.
- 803 49. **Montefiori DC.** 2009. Measuring HIV neutralization in a luciferase reporter gene assay. *Methods*  
804 *Mol Biol* **485**:395-405.
- 805 50. **Pollara J, Hart L, Brewer F, Pickeral J, Packard BZ, Hoxie JA, Komoriya A, Ochsenbauer C,**  
806 **Kappes JC, Roederer M, Huang Y, Weinhold KJ, Tomaras GD, Haynes BF, Montefiori DC, Ferrari**  
807 **G.** 2011. High-throughput quantitative analysis of HIV-1 and SIV-specific ADCC-mediating  
808 antibody responses. *Cytometry A* **79**:603-612.
- 809 51. **Trkola A, Matthews J, Gordon C, Ketas T, Moore JP.** 1999. A cell line-based neutralization assay  
810 for primary human immunodeficiency virus type 1 isolates that use either the CCR5 or the  
811 CXCR4 coreceptor. *J Virol* **73**:8966-8974.
- 812 52. **Bruhns P, Iannascoli B, England P, Mancardi DA, Fernandez N, Jorieux S, Daeron M.** 2009.  
813 Specificity and affinity of human Fcγ receptors and their polymorphic variants for human  
814 IgG subclasses. *Blood* **113**:3716-3725.
- 815 53. **Koene HR, Kleijer M, Algra J, Roos D, von dem Borne AE, de Haas M.** 1997. FcγRIIIa-  
816 158V/F polymorphism influences the binding of IgG by natural killer cell FcγRIIIa,  
817 independently of the FcγRIIIa-48L/R/H phenotype. *Blood* **90**:1109-1114.
- 818 54. **Williams WB, Zhang J, Jiang C, Nicely NI, Fera D, Luo K, Moody MA, Liao HX, Alam SM, Kepler**  
819 **TB, Ramesh A, Wiehe K, Holland JA, Bradley T, Vandergrift N, Saunders KO, Parks R, Foulger A,**  
820 **Xia SM, Bonsignori M, Montefiori DC, Louder M, Eaton A, Santra S, Scearce R, Sutherland L,**  
821 **Newman A, Bouton-Verville H, Bowman C, Bomze H, Gao F, Marshall DJ, Whitesides JF, Nie X,**  
822 **Kelsoe G, Reed SG, Fox CB, Clary K, Koutsoukos M, Franco D, Mascola JR, Harrison SC, Haynes**  
823 **BF, Verkoczy L.** 2017. Initiation of HIV neutralizing B cell lineages with sequential envelope  
824 immunizations. *Nat Commun* **8**:1732.
- 825 55. **Reiss S, Baxter AE, Cirelli KM, Dan JM, Morou A, Daigneault A, Brassard N, Silvestri G, Routy**  
826 **JP, Havenar-Daughton C, Crotty S, Kaufmann DE.** 2017. Comparative analysis of activation  
827 induced marker (AIM) assays for sensitive identification of antigen-specific CD4 T cells. *PLoS One*  
828 **12**:e0186998.

829



Fig 1

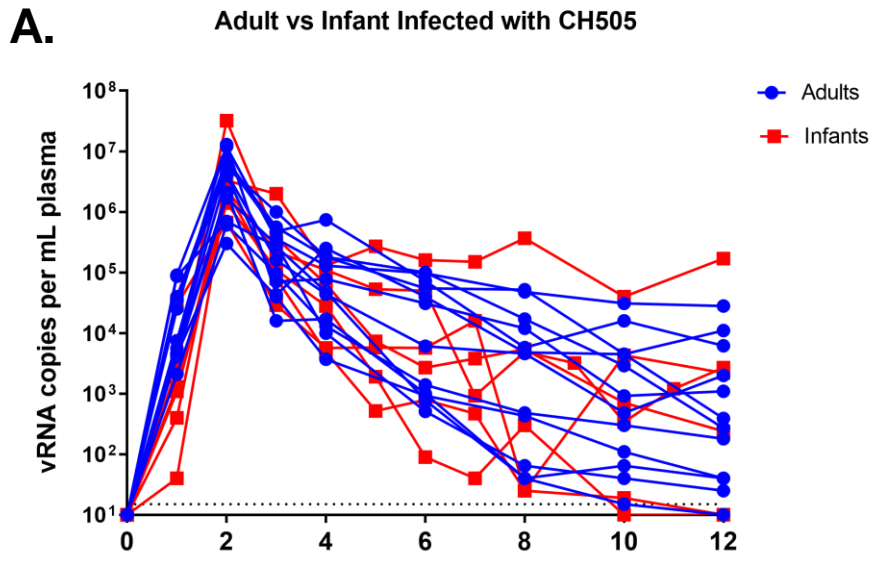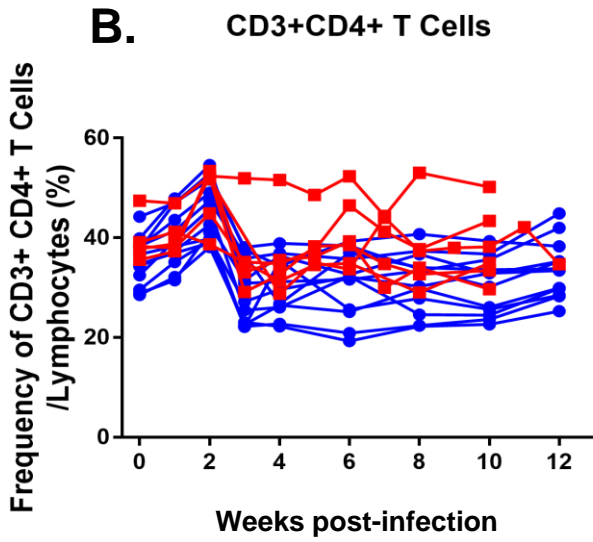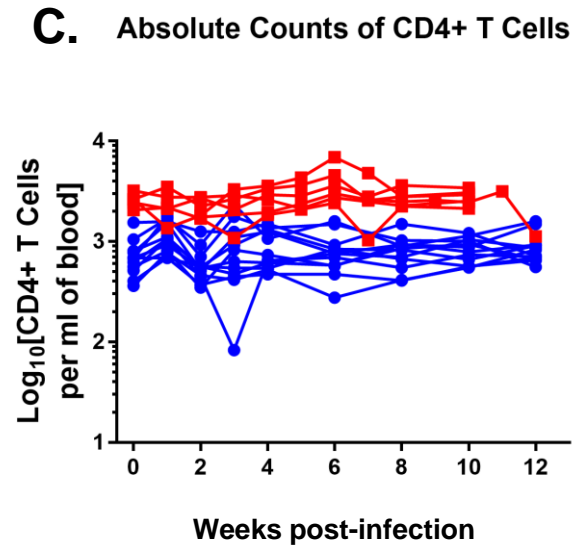

Fig 2

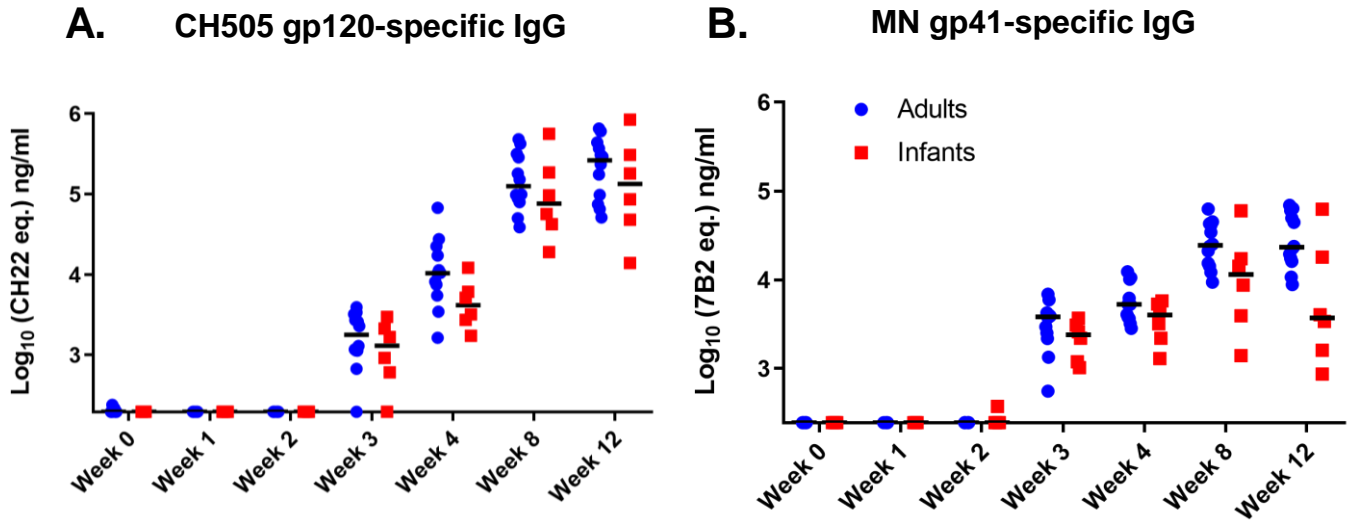

Fig 3

**A.** Epitope Specificity  
Week 4

• Adults  
• Infants

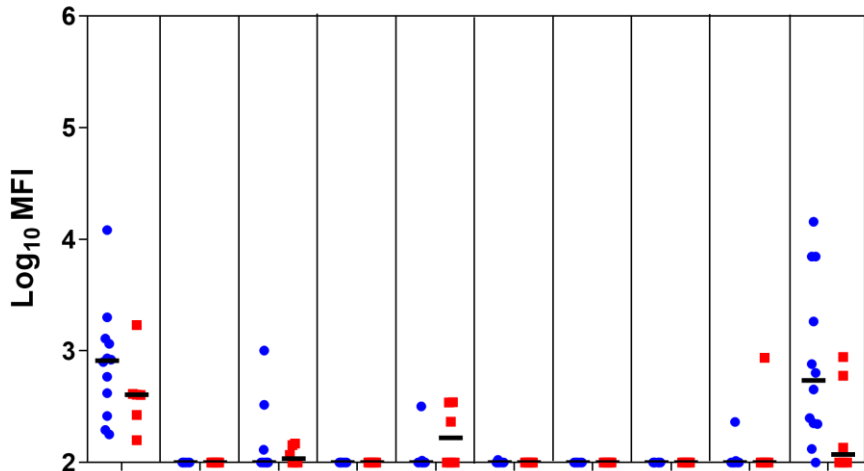

**B.** Week 12

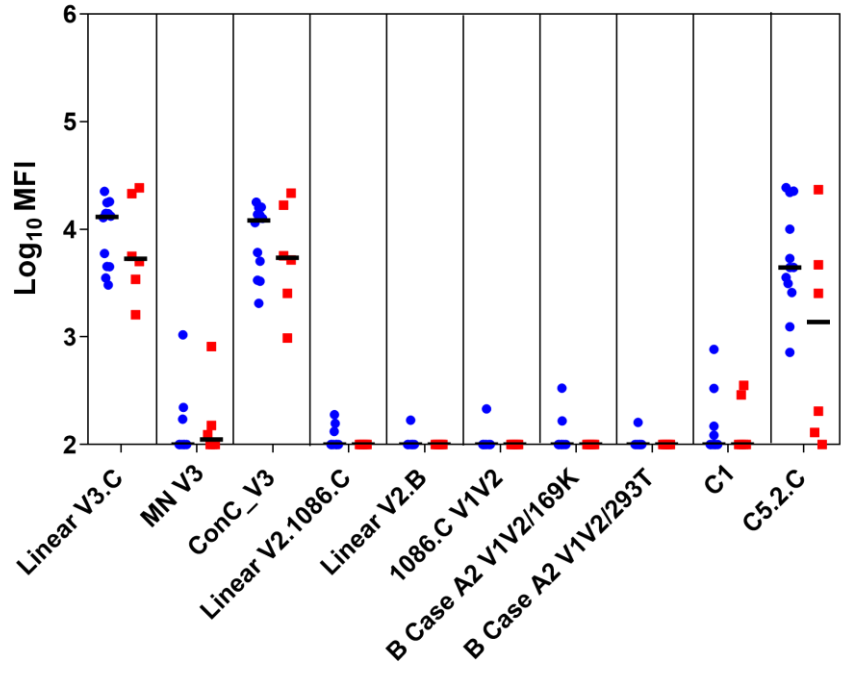

**C.** %blocking of soluble CD4

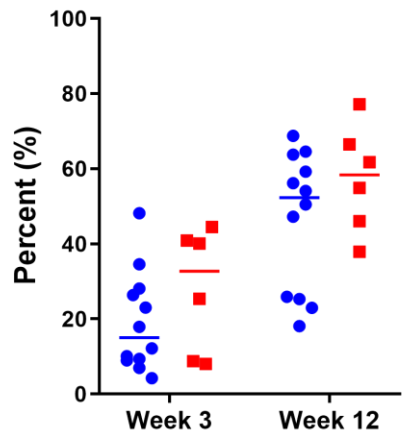



Fig 5

CH505-specific Tfh

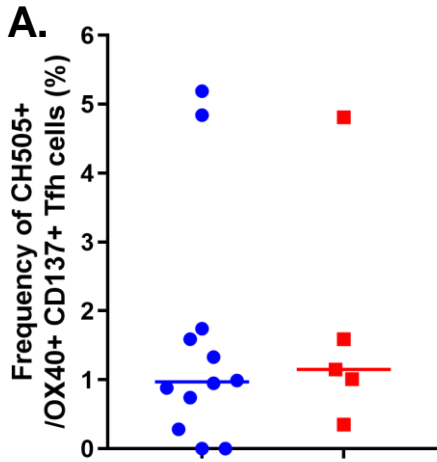

CD4+ CXCR5<sup>hi</sup> PD1<sup>hi</sup> Tfh

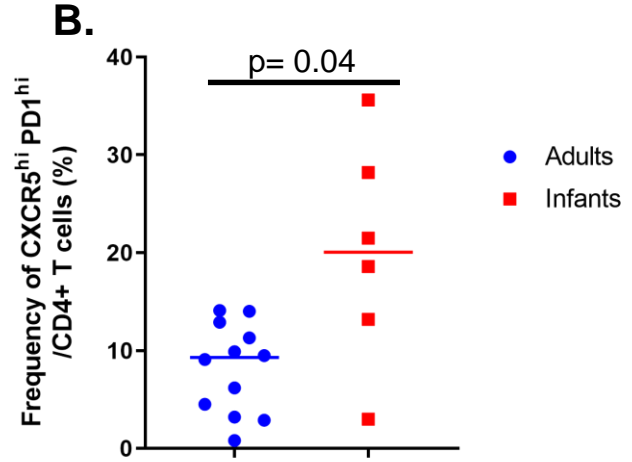

**C.** Tfh1

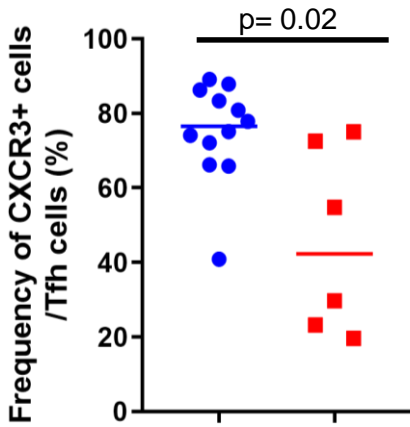

**D.** Tfh2

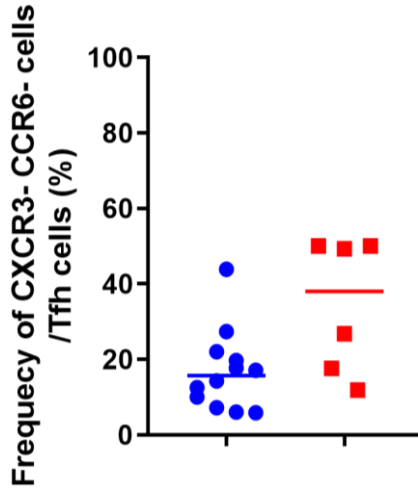

**E.** Tfh17

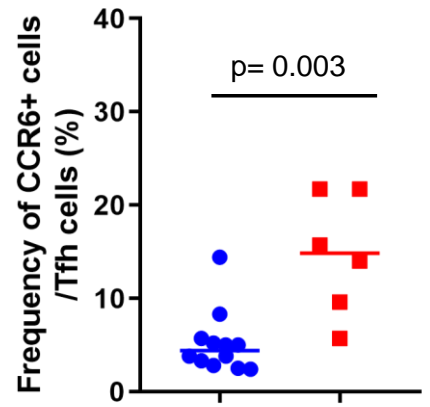

Fig 6

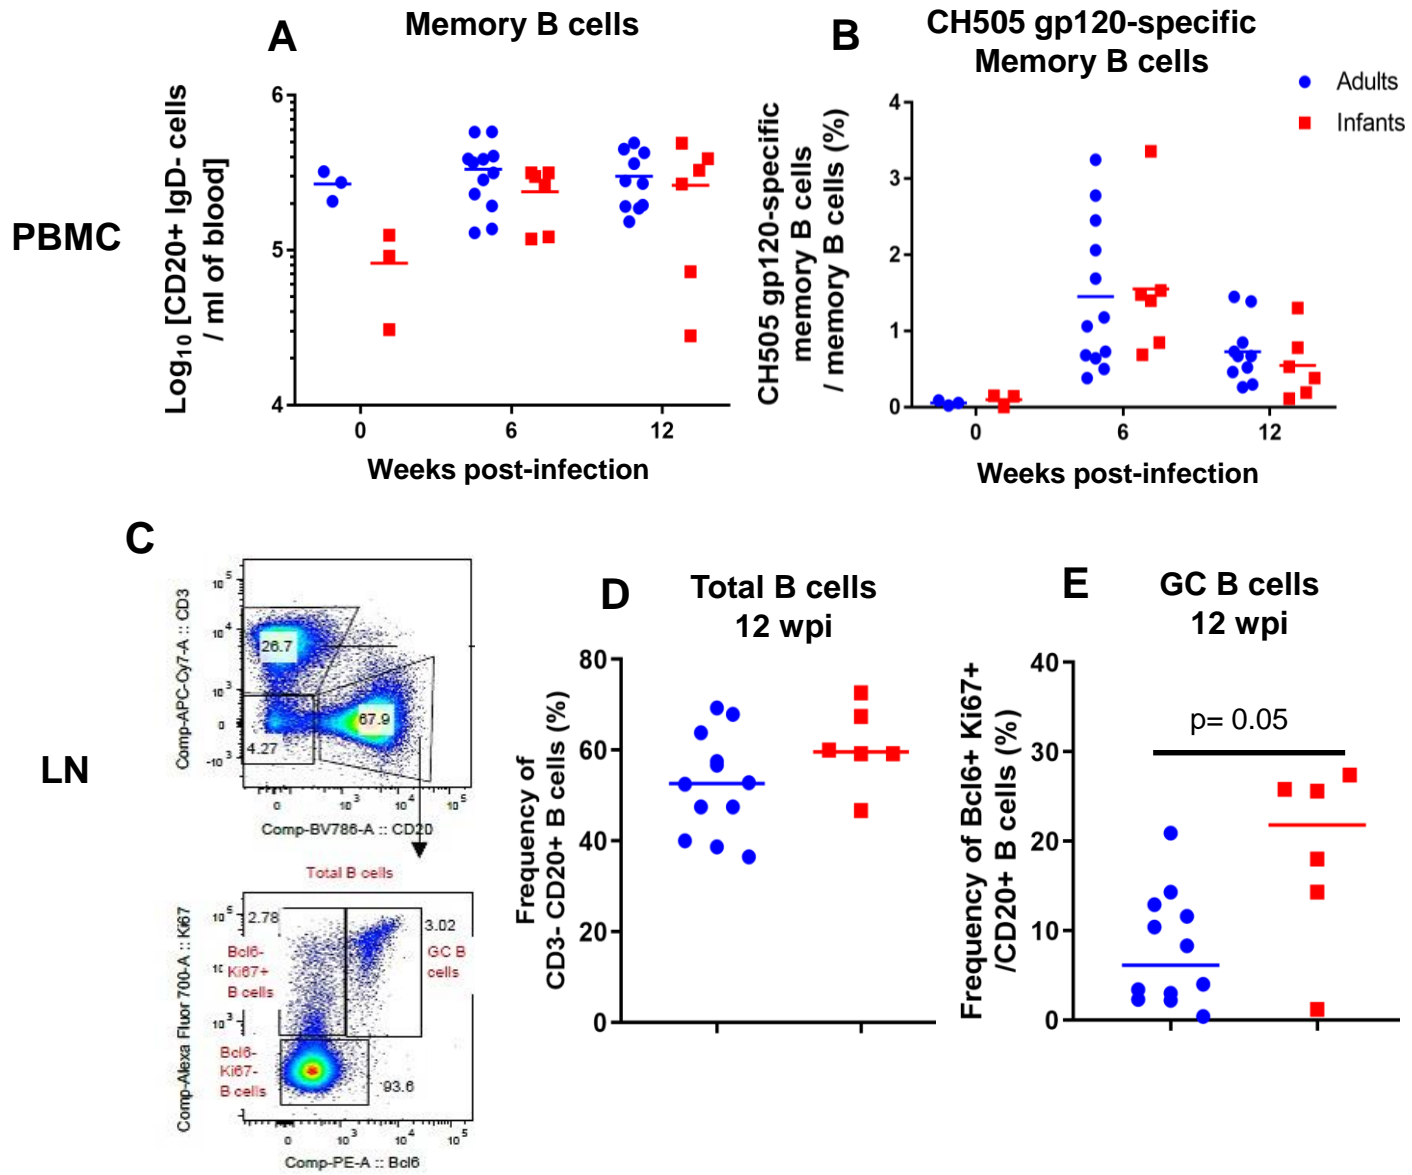

Fig 7

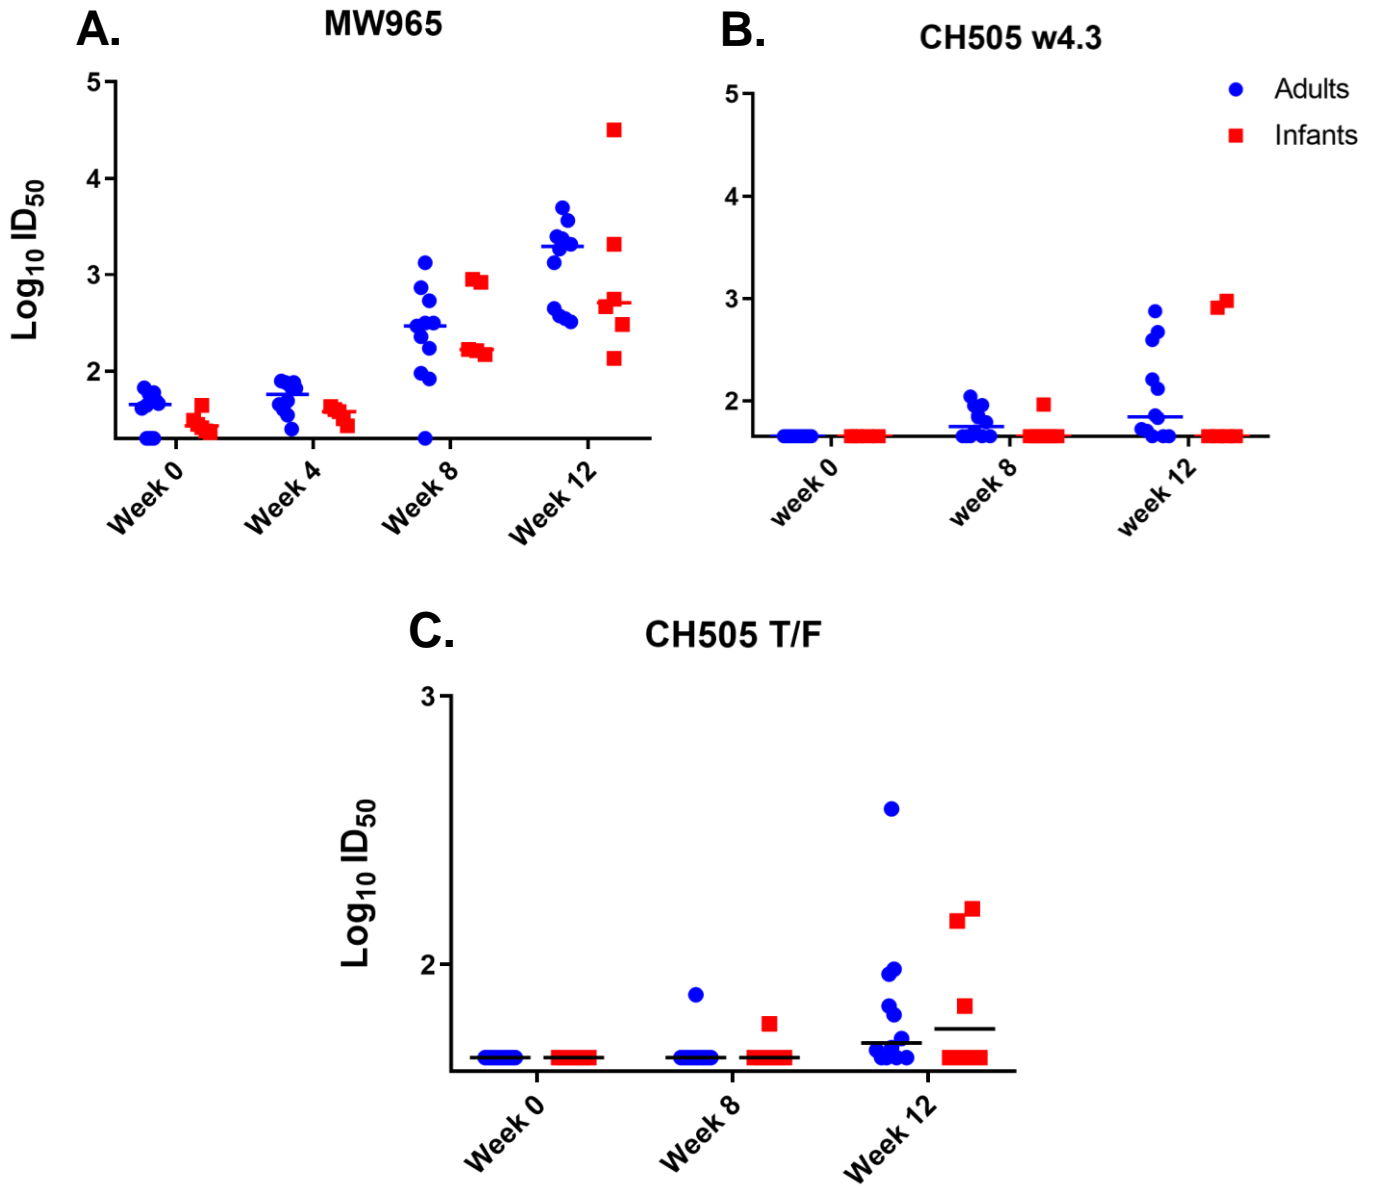

Fig 8

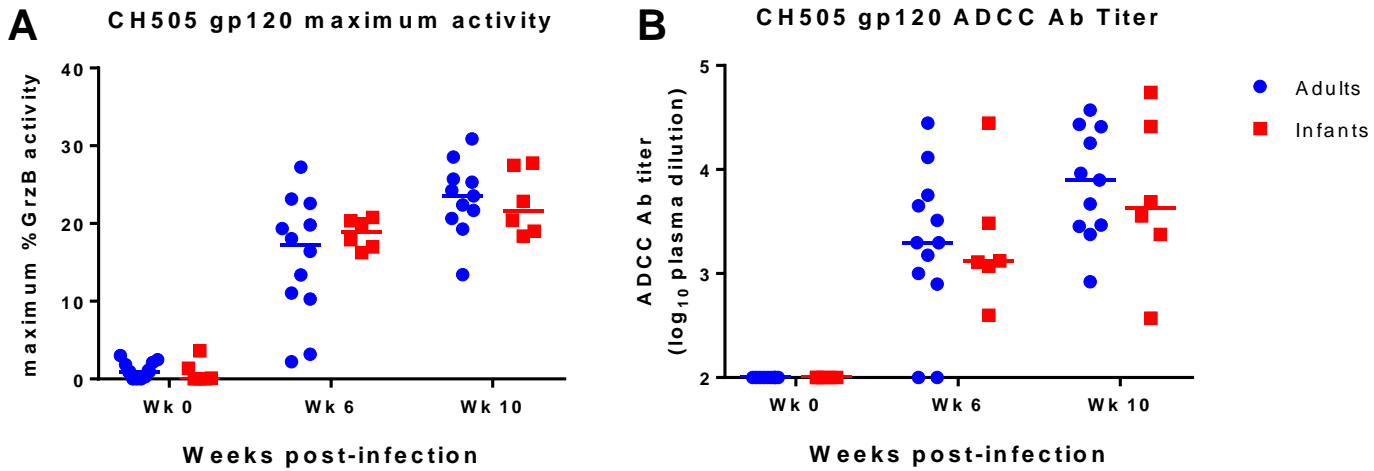



Fig 9

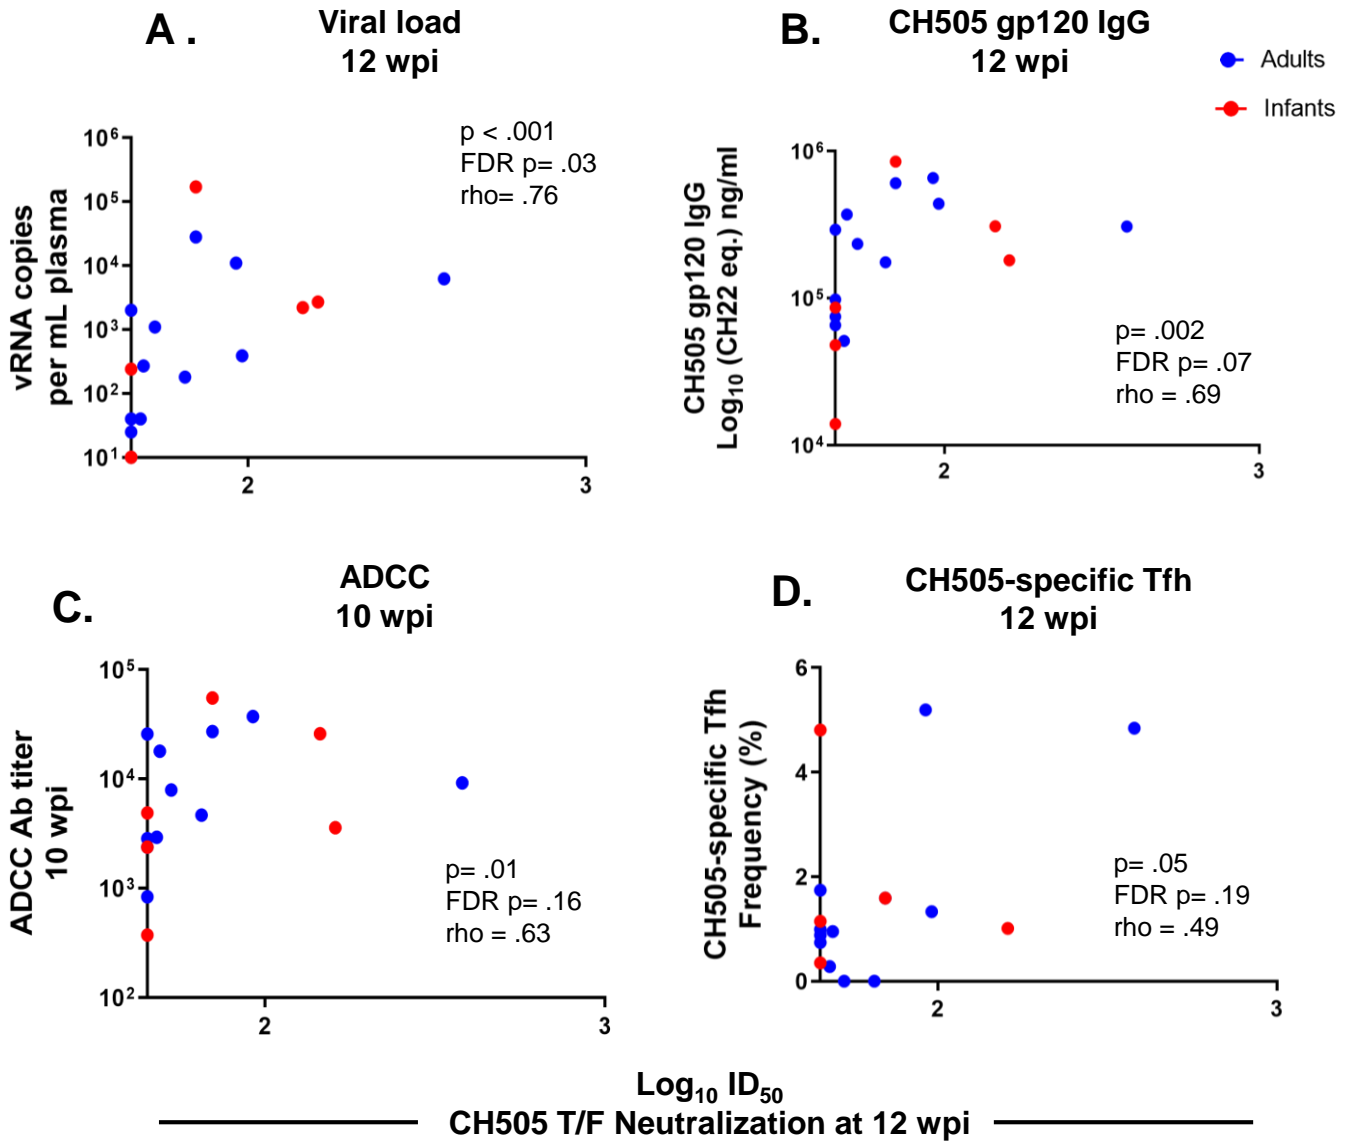

**Table 1.** Infant and adult SHIV.C.CH505- infected monkey cohort information, number of challenges to infection, and age at infection

| <b>Group and Animal ID</b> | <b>Sex<sup>a</sup></b> | <b>Weeks of challenges to infection</b> | <b>Age at infection</b> |
|----------------------------|------------------------|-----------------------------------------|-------------------------|
| Infants                    |                        | Oral Challenge                          | Age (weeks)             |
| 46346                      | F                      | 2                                       | 9                       |
| 46352                      | F                      | 2                                       | 9                       |
| 46357                      | M                      | 1                                       | 5                       |
| 46359                      | F                      | 3                                       | 10                      |
| 46367                      | M                      | 7                                       | 14                      |
| 46380                      | F                      | 4                                       | 11                      |
| Adults                     |                        | IV Challenge                            | Age (years)             |
| 39472                      | F                      | 1                                       | 8                       |
| 42870                      | F                      | 1                                       | 5                       |
| 41919                      | F                      | 1                                       | 6                       |
| 43068                      | F                      | 1                                       | 5                       |
| 43268                      | F                      | 1                                       | 4                       |
| 42814                      | F                      | 1                                       | 5                       |
| 42368                      | F                      | 1                                       | 5                       |
| 43633                      | F                      | 1                                       | 4                       |
| 39950                      | F                      | 1                                       | 8                       |
| 41522                      | F                      | 1                                       | 6                       |
| 38200                      | F                      | 1                                       | 10                      |
| 41672                      | F                      | 1                                       | 6                       |

<sup>a</sup> F, female; M, male
